# Supplementary material for: Phenolic Constituents of Chinese Quince Twigs (Chaenomeles sinensis Koehne) and Their Anti-Neuroinflammatory, Neurotrophic, and Cytotoxic Activities
Source: Antioxidants (Basel). 2021 Apr 2;10(4):551. doi: 10.3390/antiox10040551 (PMC8067024; doi:10.3390/antiox10040551)

# Phenolic constituents of Chinese Quince (*Chaenomeles sinensis* Koehne) and their anti-neuroinflammatory, neurotrophic, and cytotoxic activities

Dong Hyun Kim,<sup>†</sup> Lalita Subedi,<sup>‡</sup> Hye Ryeong Kim,<sup>†</sup> Sang Un Choi,<sup>§</sup> Sun Yeou Kim,<sup>‡,⊥</sup> Chung Sub Kim<sup>\*,†,∇</sup>

<sup>†</sup>School of Pharmacy, Sungkyunkwan University, Suwon 16419, Republic of Korea

<sup>‡</sup>Gachon Institute of Pharmaceutical Science, Gachon University, Incheon 21936, Republic of Korea

<sup>§</sup>Korea Research Institute of Chemical Technology, Daejeon 34114, Republic of Korea

<sup>⊥</sup>College of Pharmacy, Gachon University, #191, Hambakmoero, Yeonsu-gu, Incheon 21936, Republic of Korea

<sup>∇</sup>Department of Biopharmaceutical Convergence, Sungkyunkwan University, Suwon, 16419, Republic of Korea

Corresponding Authors:

\*Tel: +82-31-290-7727. E-mail: chungsub.kim@skku.edu

## Contents

|                                                                                                                                                                                  |    |
|----------------------------------------------------------------------------------------------------------------------------------------------------------------------------------|----|
| <b>General Experimental Procedures.</b> (Detailed isolation process) .....                                                                                                       | 1  |
| <b>Scheme S1.</b> Fractionation and isolation process of compounds <b>1–24</b> from <i>C. sinensis</i> twigs.....                                                                | 2  |
| <b>Figure S1.</b> HRESIMS spectrum of <b>1</b> .....                                                                                                                             | 0  |
| <b>Figure S2.</b> ECD spectrum of <b>1</b> .....                                                                                                                                 | 1  |
| <b>Figure S3.</b> <sup>1</sup> H NMR spectrum of <b>1</b> in chloroform- <i>d</i> (700 MHz) .....                                                                                | 2  |
| <b>Figure S4.</b> <sup>13</sup> C NMR spectrum of <b>1</b> in chloroform- <i>d</i> (175 MHz) .....                                                                               | 3  |
| <b>Figure S5.</b> <sup>1</sup> H- <sup>1</sup> H COSY spectrum of <b>1</b> in chloroform- <i>d</i> .....                                                                         | 4  |
| <b>Figure S6.</b> HSQC spectrum of <b>1</b> in chloroform- <i>d</i> .....                                                                                                        | 5  |
| <b>Figure S7.</b> HMBC spectrum of <b>1</b> in chloroform- <i>d</i> .....                                                                                                        | 6  |
| <b>Figure S8.</b> HRFABMS spectrum of <b>9</b> .....                                                                                                                             | 7  |
| <b>Figure S9.</b> ECD spectra of <b>9</b> (top) and <b>25</b> (bottom, adopted from the original paper). .....                                                                   | 8  |
| <b>Figure S10.</b> <sup>1</sup> H NMR spectrum of <b>9</b> in methanol- <i>d</i> <sub>4</sub> (700 MHz) .....                                                                    | 9  |
| <b>Figure S11.</b> <sup>13</sup> C NMR spectrum of <b>9</b> in methanol- <i>d</i> <sub>4</sub> (175 MHz) .....                                                                   | 10 |
| <b>Figure S12.</b> <sup>1</sup> H- <sup>1</sup> H COSY spectrum of <b>9</b> in methanol- <i>d</i> <sub>4</sub> .....                                                             | 11 |
| <b>Figure S13.</b> HSQC spectrum of <b>9</b> in methanol- <i>d</i> <sub>4</sub> .....                                                                                            | 12 |
| <b>Figure S14.</b> HMBC spectrum of <b>9</b> in methanol- <i>d</i> <sub>4</sub> .....                                                                                            | 13 |
| <b>Figure S15.</b> Extracted ion chromatograms (EICs, <i>m/z</i> 431.1311) of chiral derivatized L- and D-rhamnopyranose purchased or obtained by hydrolysis of <b>9</b> .....   | 14 |
| <b>Figure S16.</b> HRESIMS spectrum of <b>11</b> .....                                                                                                                           | 15 |
| <b>Figure S17.</b> <sup>1</sup> H NMR spectrum of <b>11</b> in methanol- <i>d</i> <sub>4</sub> (700 MHz) .....                                                                   | 16 |
| <b>Figure S18.</b> <sup>13</sup> C NMR spectrum of <b>11</b> in methanol- <i>d</i> <sub>4</sub> (175 MHz) .....                                                                  | 17 |
| <b>Figure S19.</b> <sup>1</sup> H- <sup>1</sup> H COSY spectrum of <b>11</b> in methanol- <i>d</i> <sub>4</sub> .....                                                            | 18 |
| <b>Figure S20.</b> HSQC spectrum of <b>11</b> in methanol- <i>d</i> <sub>4</sub> .....                                                                                           | 19 |
| <b>Figure S21.</b> HMBC spectrum of <b>11</b> in methanol- <i>d</i> <sub>4</sub> .....                                                                                           | 20 |
| <b>Figure S22.</b> Extracted ion chromatograms (EICs, <i>m/z</i> 447.1260) of chiral derivatized D- and L-glucopyranose purchased or obtained by hydrolysis of <b>11</b> . ..... | 21 |
| <b>Figure S23.</b> <sup>1</sup> H NMR spectrum of <b>2</b> in chloroform- <i>d</i> (700 MHz) .....                                                                               | 22 |
| <b>Figure S24.</b> <sup>13</sup> C NMR spectrum of <b>2</b> in chloroform- <i>d</i> (700 MHz) .....                                                                              | 23 |
| <b>Figure S25.</b> <sup>1</sup> H NMR spectrum of <b>3</b> in chloroform- <i>d</i> (700 MHz) .....                                                                               | 24 |
| <b>Figure S26.</b> <sup>13</sup> C NMR spectrum of <b>3</b> in chloroform- <i>d</i> (700 MHz) .....                                                                              | 25 |

## General Experimental Procedures. (Detailed isolation process)

The CHCl<sub>3</sub> soluble layer (15 g) was applied to silica gel column chromatography (CHCl<sub>3</sub>-MeOH, 50:1 → 1:1) to yield 12 fractions (C1-C12). Fraction C3 (600 mg) was subjected to RP-C<sub>18</sub> silica gel column (60% aqueous MeOH) to give ten subfractions (C3a-C3j). Compound **6** (4 mg) was obtained by purification of fraction C3j using semipreparative HPLC (85% aqueous MeCN). Fraction C5 (1.1 g) separated with RP-C<sub>18</sub> silica gel column with solvent system 70% aqueous MeOH to afford 12 subfractions (C5a-C5l). Subfraction C5a was fractionated over LiChroprep Lobar-A RP-C<sub>18</sub> column with 35% aqueous MeCN and further purified by semipreparative HPLC (20% aqueous MeCN) to yield compounds **1** (2 mg), **2** (2 mg), **3** (2 mg) and **13** (2 mg). The EtOAc soluble layer (3 g) was subjected to a Sephadex LH-20 column (90% aqueous MeOH) to give five fractions (E1-E5). Fraction E1 (3.8 g) was applied to silica gel column chromatography (CHCl<sub>3</sub>-MeOH, 10:1) to yield 15 subfractions (E1a-E1o). E1h (400 mg) was chromatographed over Lichroprep Lobar-A RP-C<sub>18</sub> (60% aqueous MeOH) to give five subfractions (E1h1-E1h5). E1h1 was fractionated over Lichroprep Lobar-A RP-C<sub>18</sub> column (50% aqueous MeOH) followed by semipreparative HPLC (65% aqueous MeCN) to yield compound **24** (2 mg). Subfraction E1j (260 mg) was subjected to LiChroprep Lobar-A RP-C<sub>18</sub> column with 40% aqueous MeOH to give five subfractions (E1j1-E1j5). Subfraction E1j1 was purified by semipreparative HPLC (15% aqueous MeCN) to yield compounds **20** (2 mg) and **21** (3 mg). *n*-BuOH soluble layer was applied to silica gel column chromatography eluted with CHCl<sub>3</sub>-MeOH-H<sub>2</sub>O (3:1:0.1) yielding 10 fractions (B1-B10). Fraction B3 (60 mg) was separated with RP-C<sub>18</sub> Sep-pak (45% aqueous MeOH) and further purified by semipreparative HPLC (35% MeOH) to yield compound **7** (2 mg). Fraction B4 (1.9 g) was fractionated by RP-C<sub>18</sub> silica gel column (40% aqueous MeOH) to give three subfractions (B4a-B4c). Subfraction B4a (1.5 g) was further purified by semipreparative HPLC (35% aqueous MeCN) to yield compound **18** (70 mg). Further isolation of fraction B5 (500 mg) by RP-C<sub>18</sub> silica gel column using 40% aqueous MeOH, yielded nine subfractions (B5a-B5i). Subfraction B5a was purified by semipreparative HPLC (15% aqueous MeCN) to obtain compounds **12** (5 mg) and **17** (17 mg). Subfraction B5c was purified by semipreparative HPLC (17% aqueous MeCN) to yield compounds **5** (2 mg), **9** (2 mg) and **10** (2 mg). Subfraction B5d was purified by semipreparative HPLC (17% aqueous MeCN) to give compounds **4** (5 mg) and **8** (3 mg). Subfraction B5i was purified by semipreparative HPLC (50% aqueous MeOH) to yield compounds **14** (3 mg) and **16** (4 mg). Fraction B6 (700 mg) was subjected to a RP-C<sub>18</sub> silica gel chromatography eluted with 40% aqueous MeOH to give eight subfractions (B6a-B6h). Subfraction B6a (150 mg) was purified by semipreparative HPLC (7% aqueous MeCN) to obtain compounds **22** (4 mg). Subfraction B6c (120 mg) was purified by semipreparative HPLC with solvent system 25% aqueous MeOH to give compounds **19** (34 mg). Subfraction B6d (100 mg) was chromatographed over Lichroprep Lobar-A (EtOAc-MeOH-H<sub>2</sub>O, 5:1:0.1) and further purified by semipreparative HPLC (25% aqueous MeOH) to obtain compounds **11** (5 mg). Subfraction B6e (40 mg) was purified by semipreparative HPLC with solvent system 30% aqueous MeOH to yield compounds **23** (3 mg). Subfraction B6h was purified by semipreparative HPLC (40% aqueous MeOH) to give compounds **15** (7 mg).

**Scheme S1.** Fractionation and isolation process of compounds **1–24** from *C. sinensis* twigs.

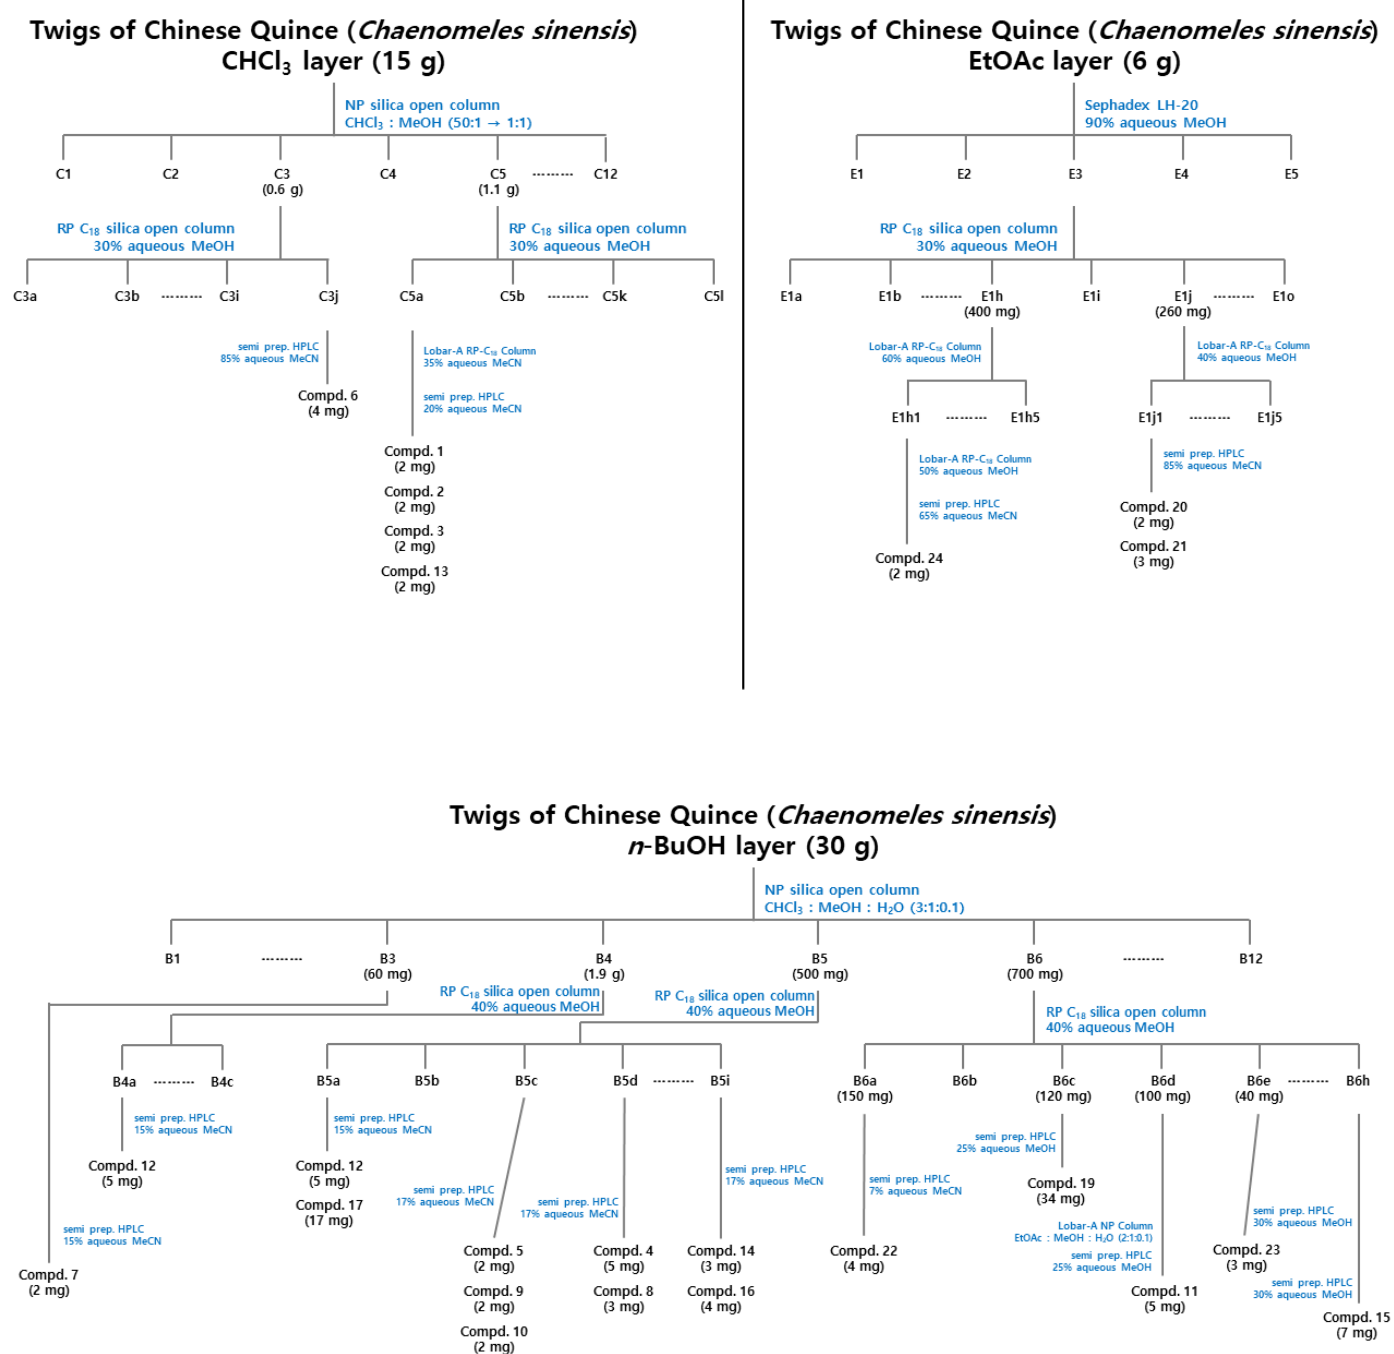

Figure S1. HRESIMS spectrum of 1

140709\_MGCC7\_004-c2 #26-34 RT: 0.53-0.69 AV: 9 SB: 2 0.38-0.40 NL: 7.23E3  
T: + c FAB Full ms [995601000.50]

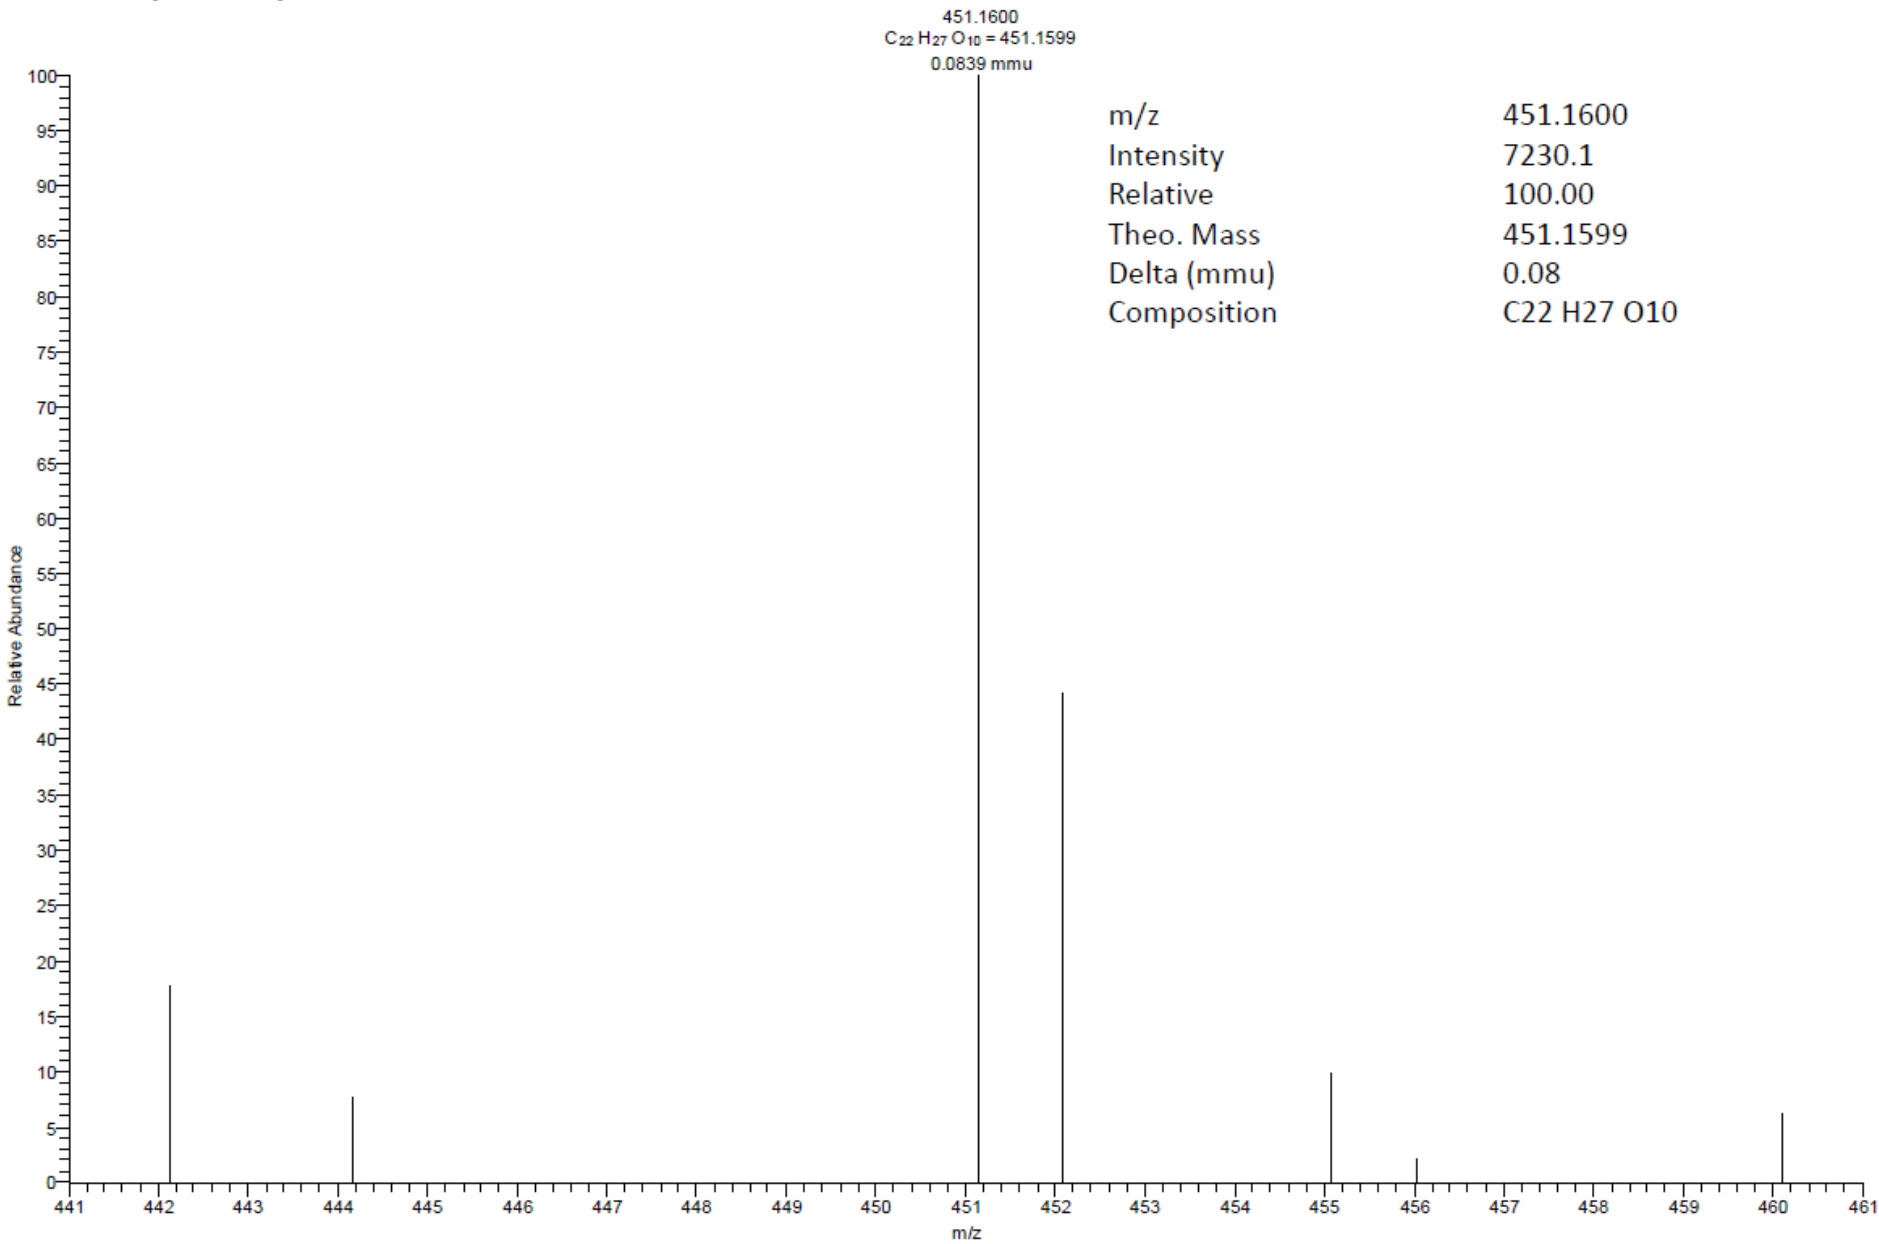

**Figure S2.** ECD spectrum of **1**

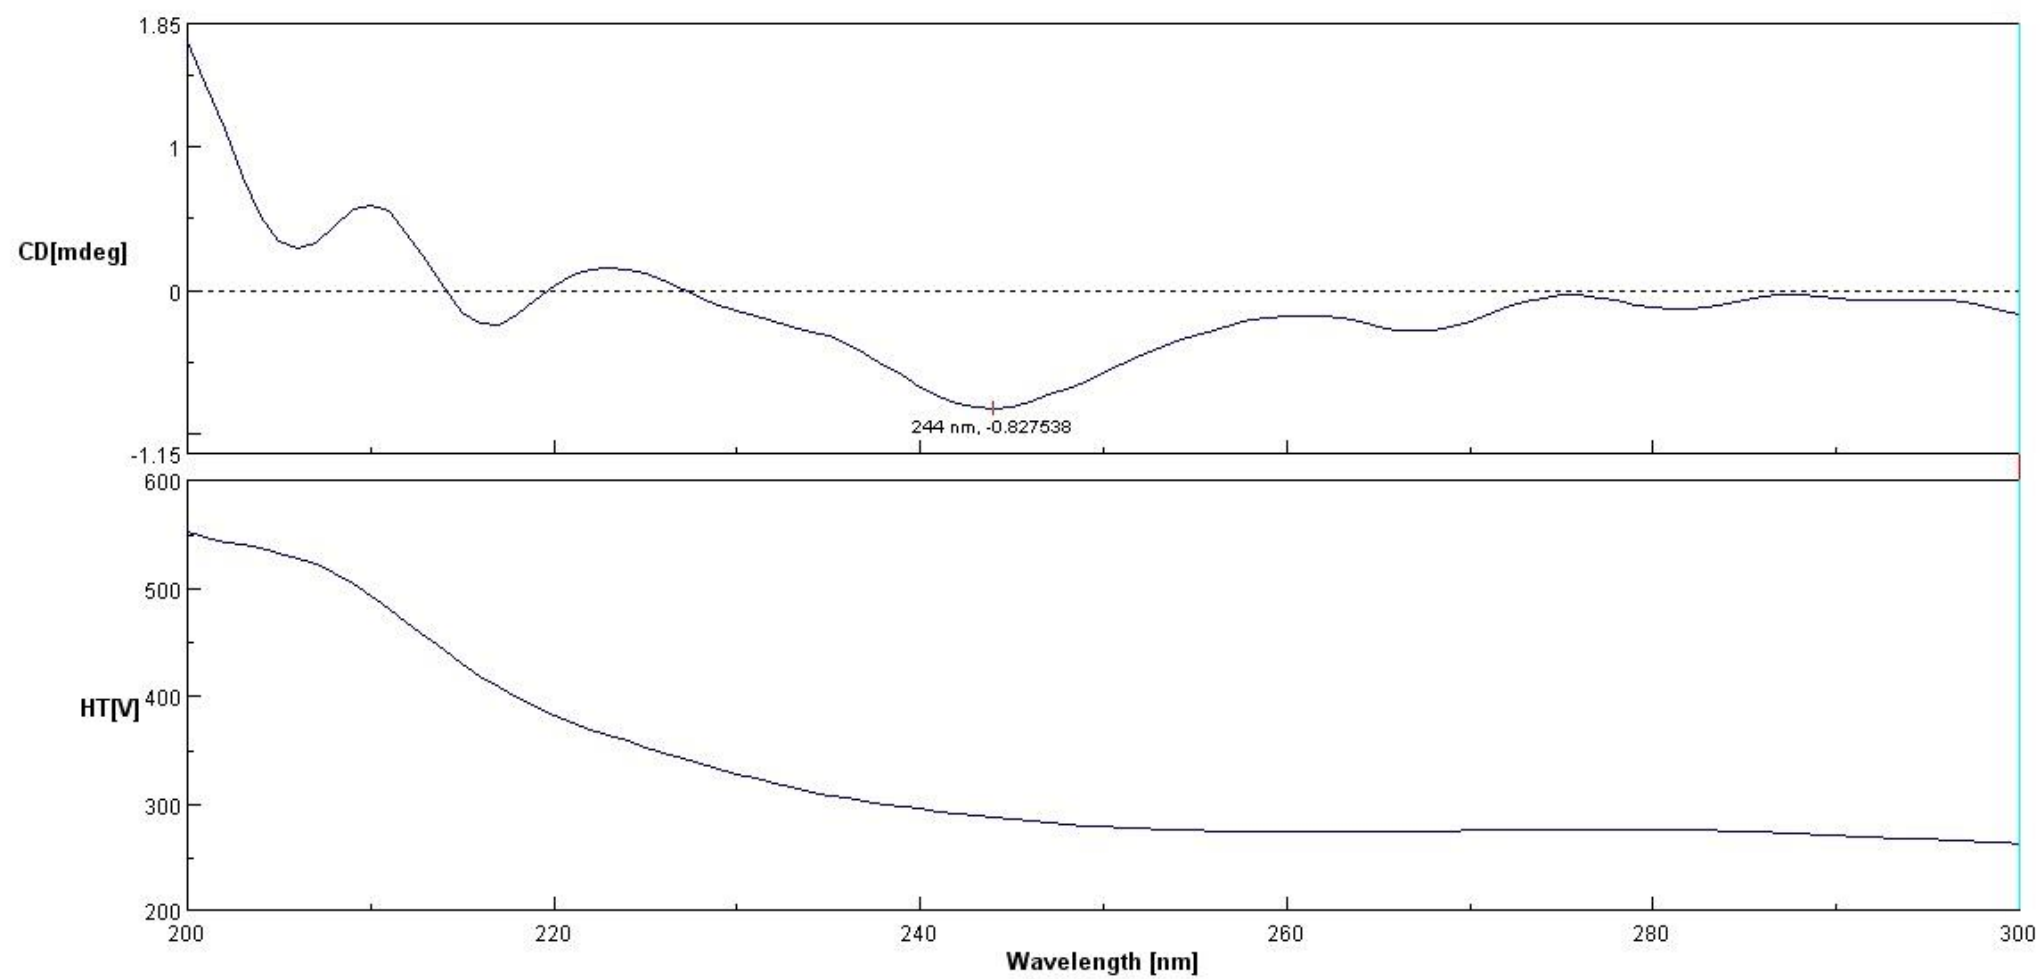

**Figure S3.**  $^1\text{H}$  NMR spectrum of **1** in chloroform-*d* (700 MHz)

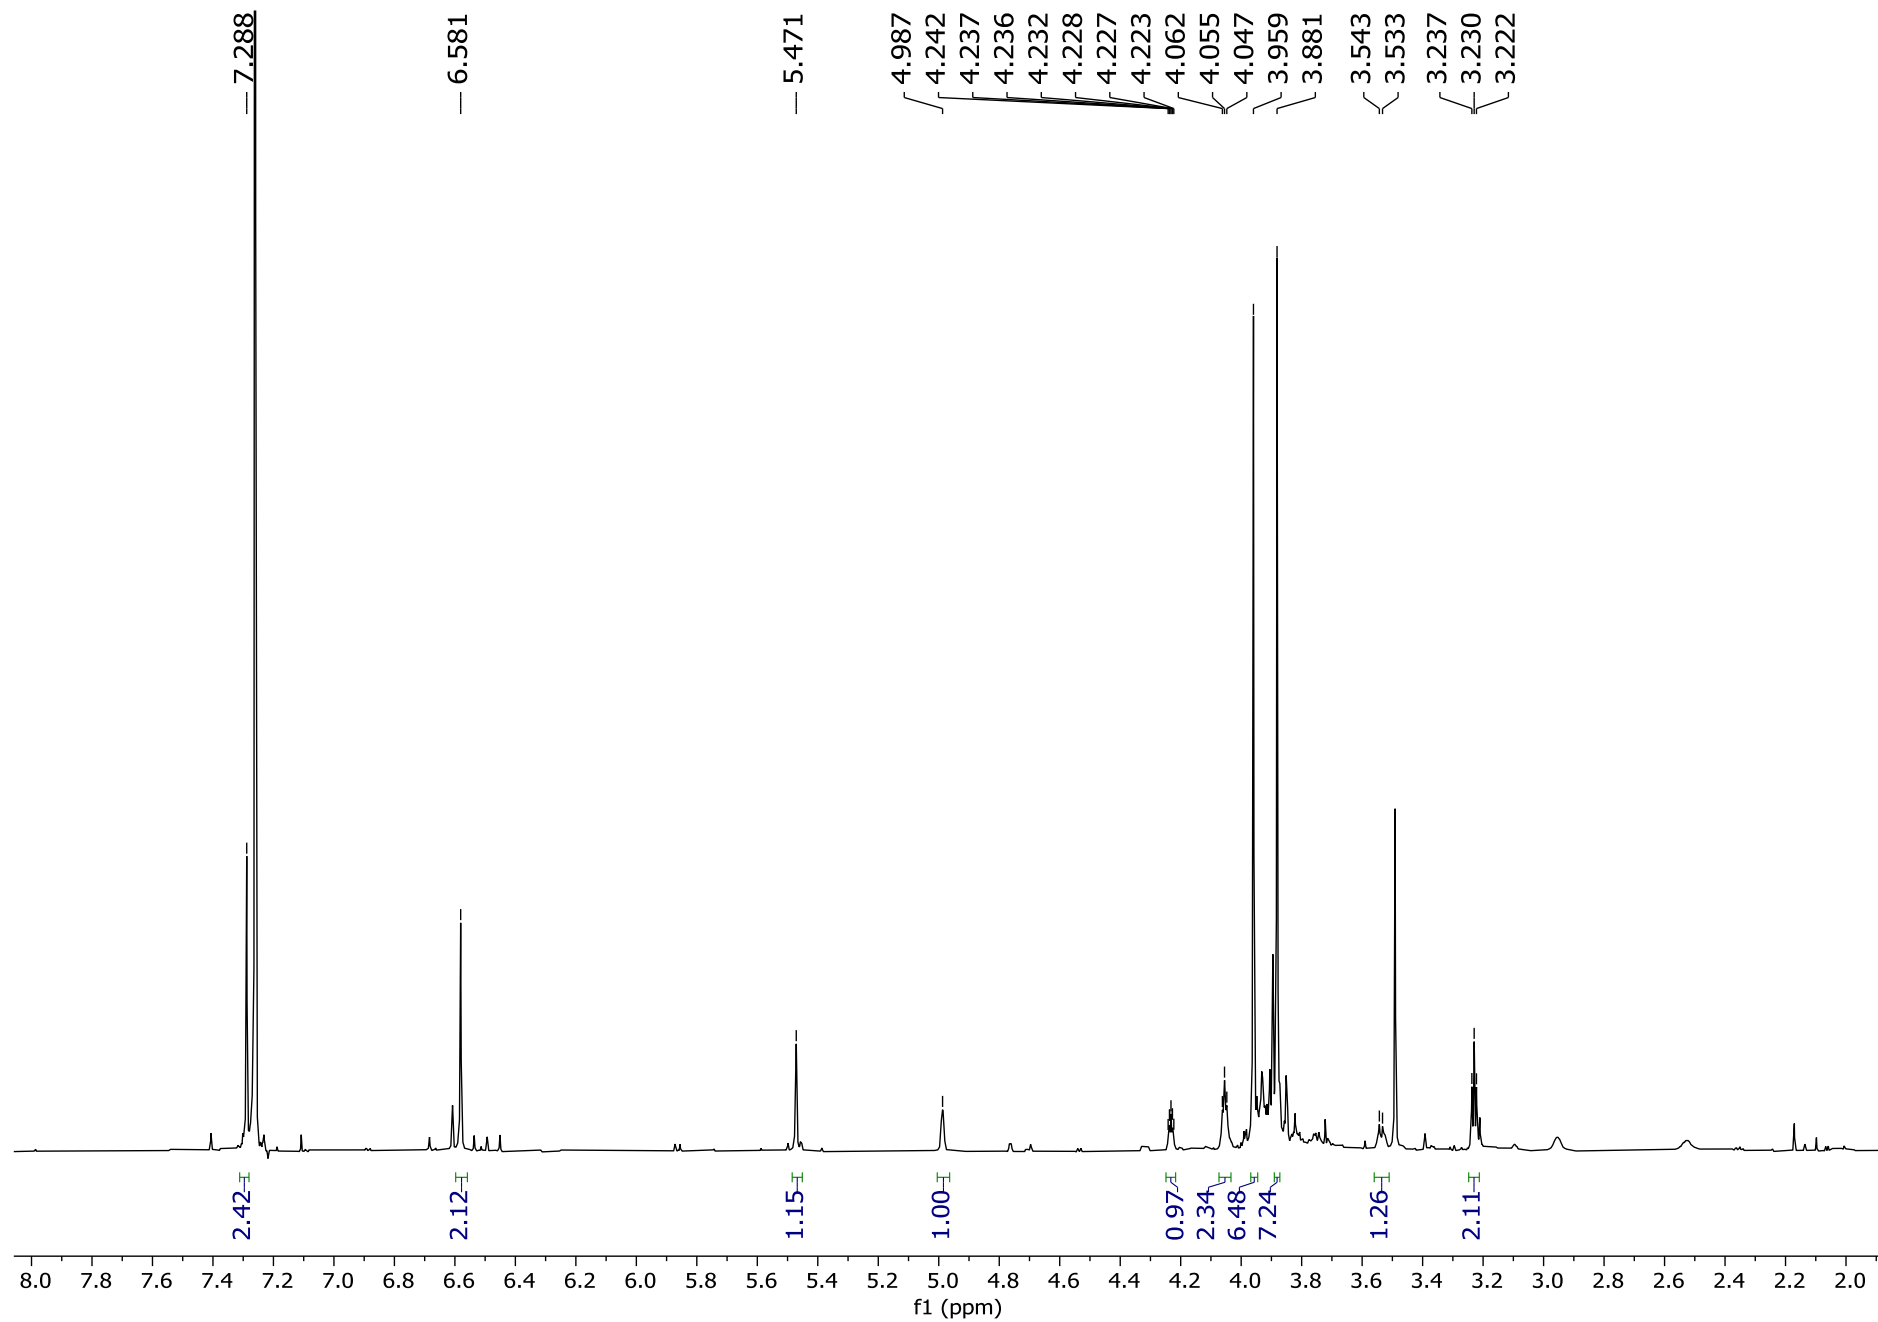

**Figure S4.**  $^{13}\text{C}$  NMR spectrum of **1** in chloroform-*d* (175 MHz)

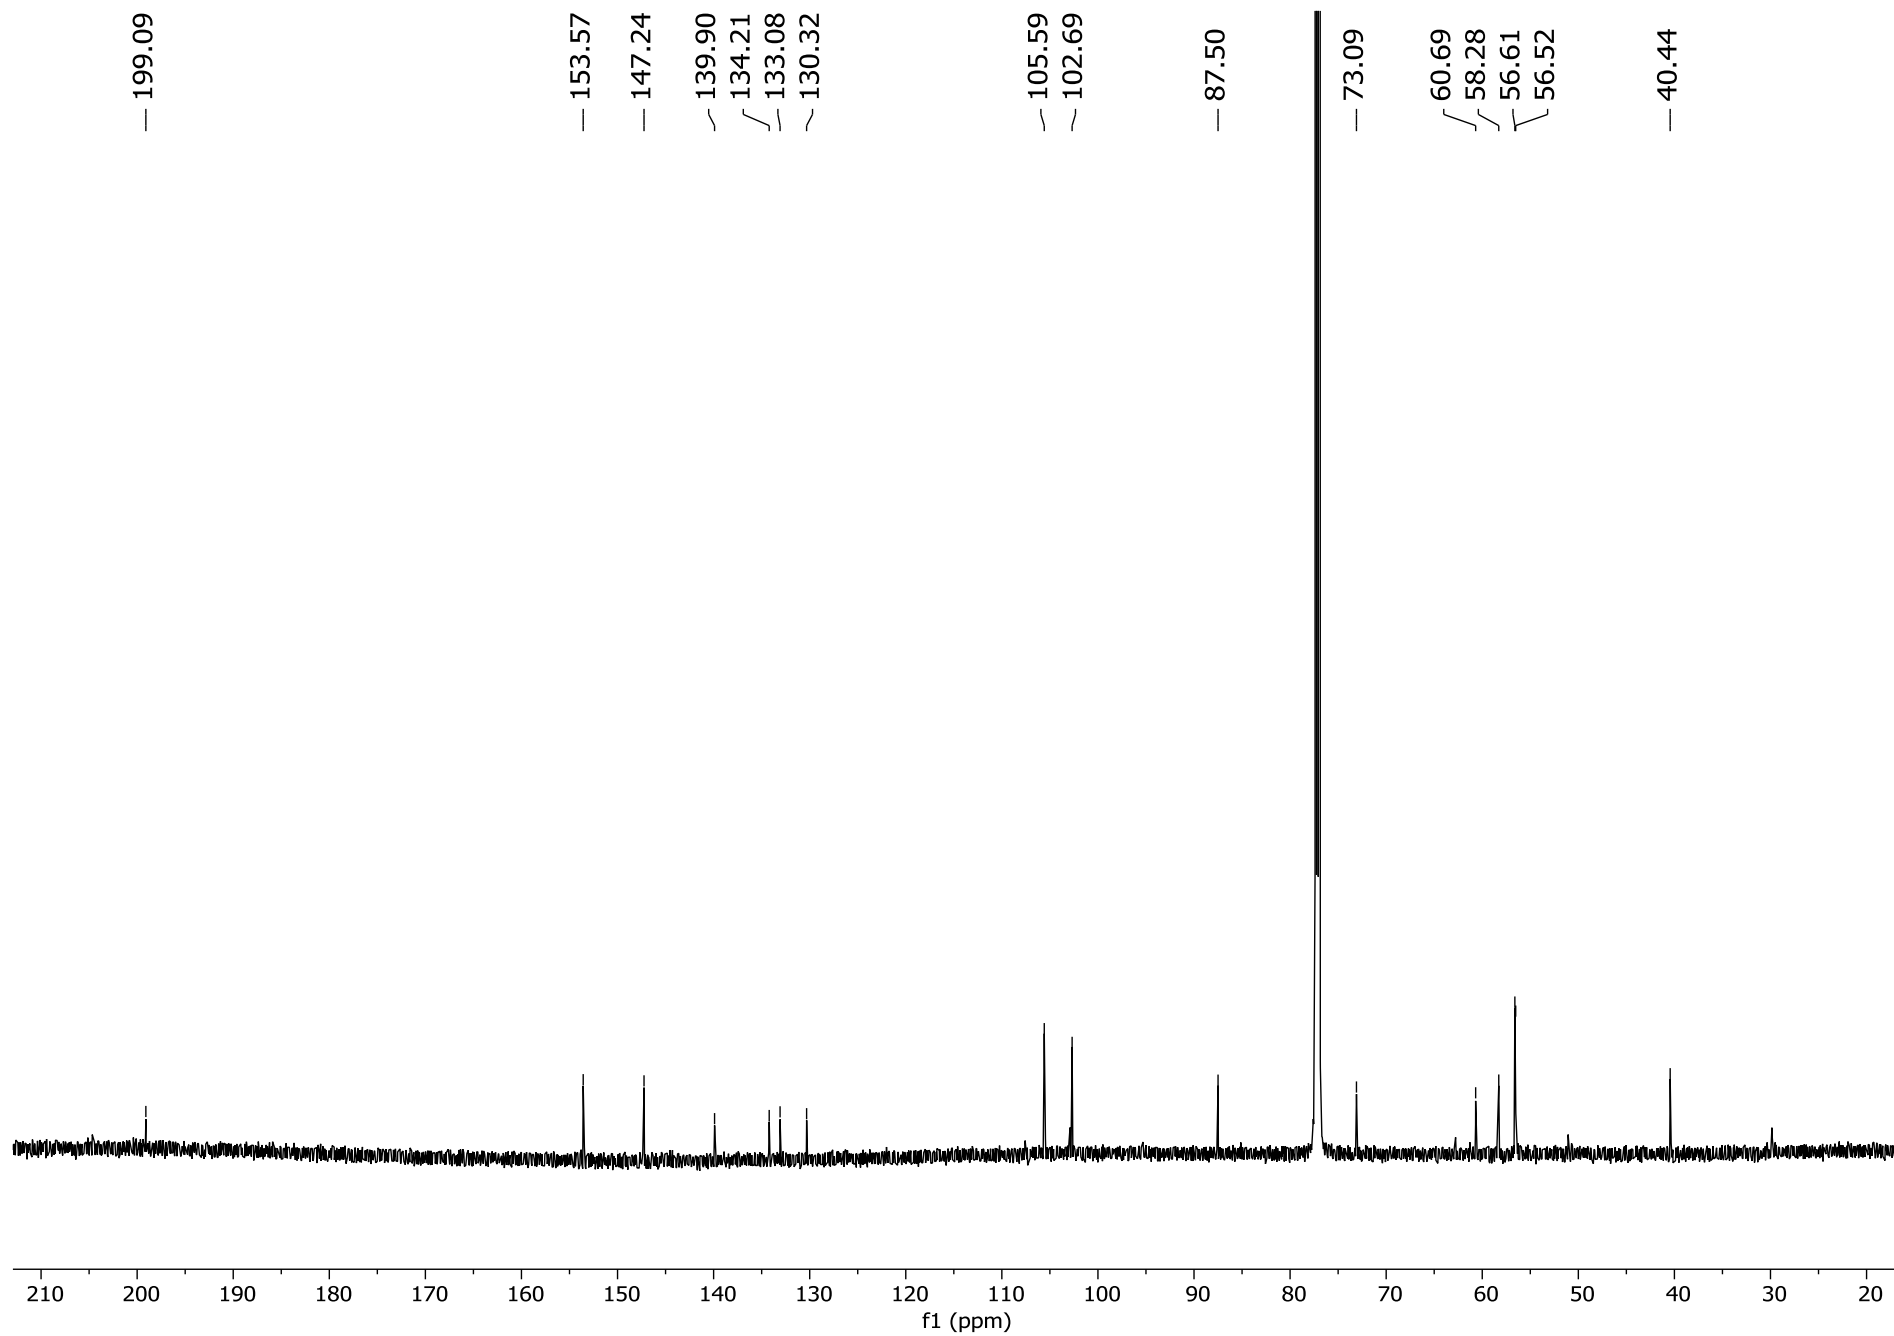

**Figure S5.**  $^1\text{H}$ - $^1\text{H}$  COSY spectrum of **1** in chloroform-*d*

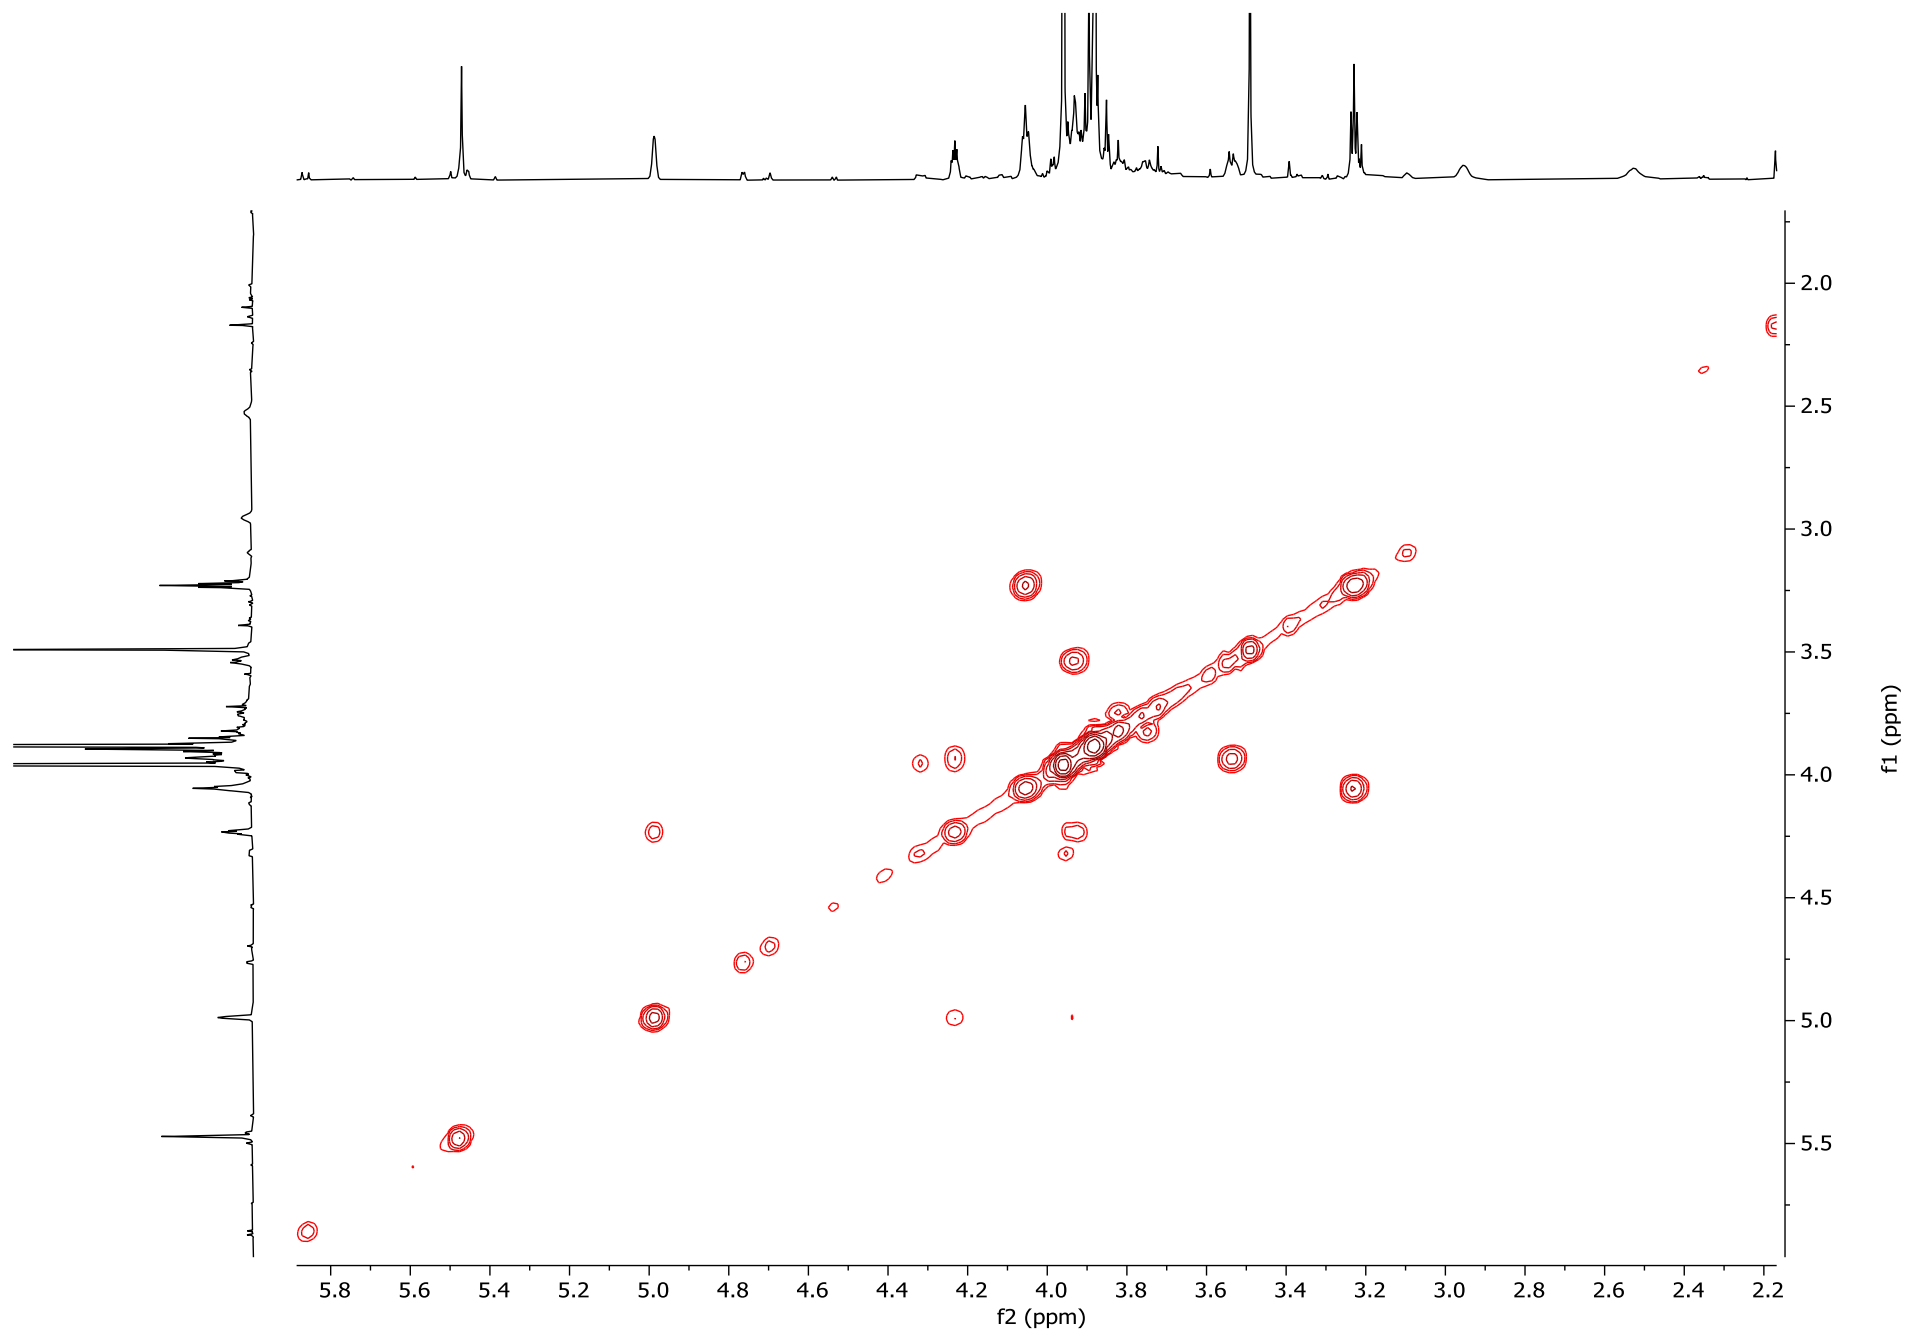

**Figure S6.** HSQC spectrum of **1** in chloroform-*d*

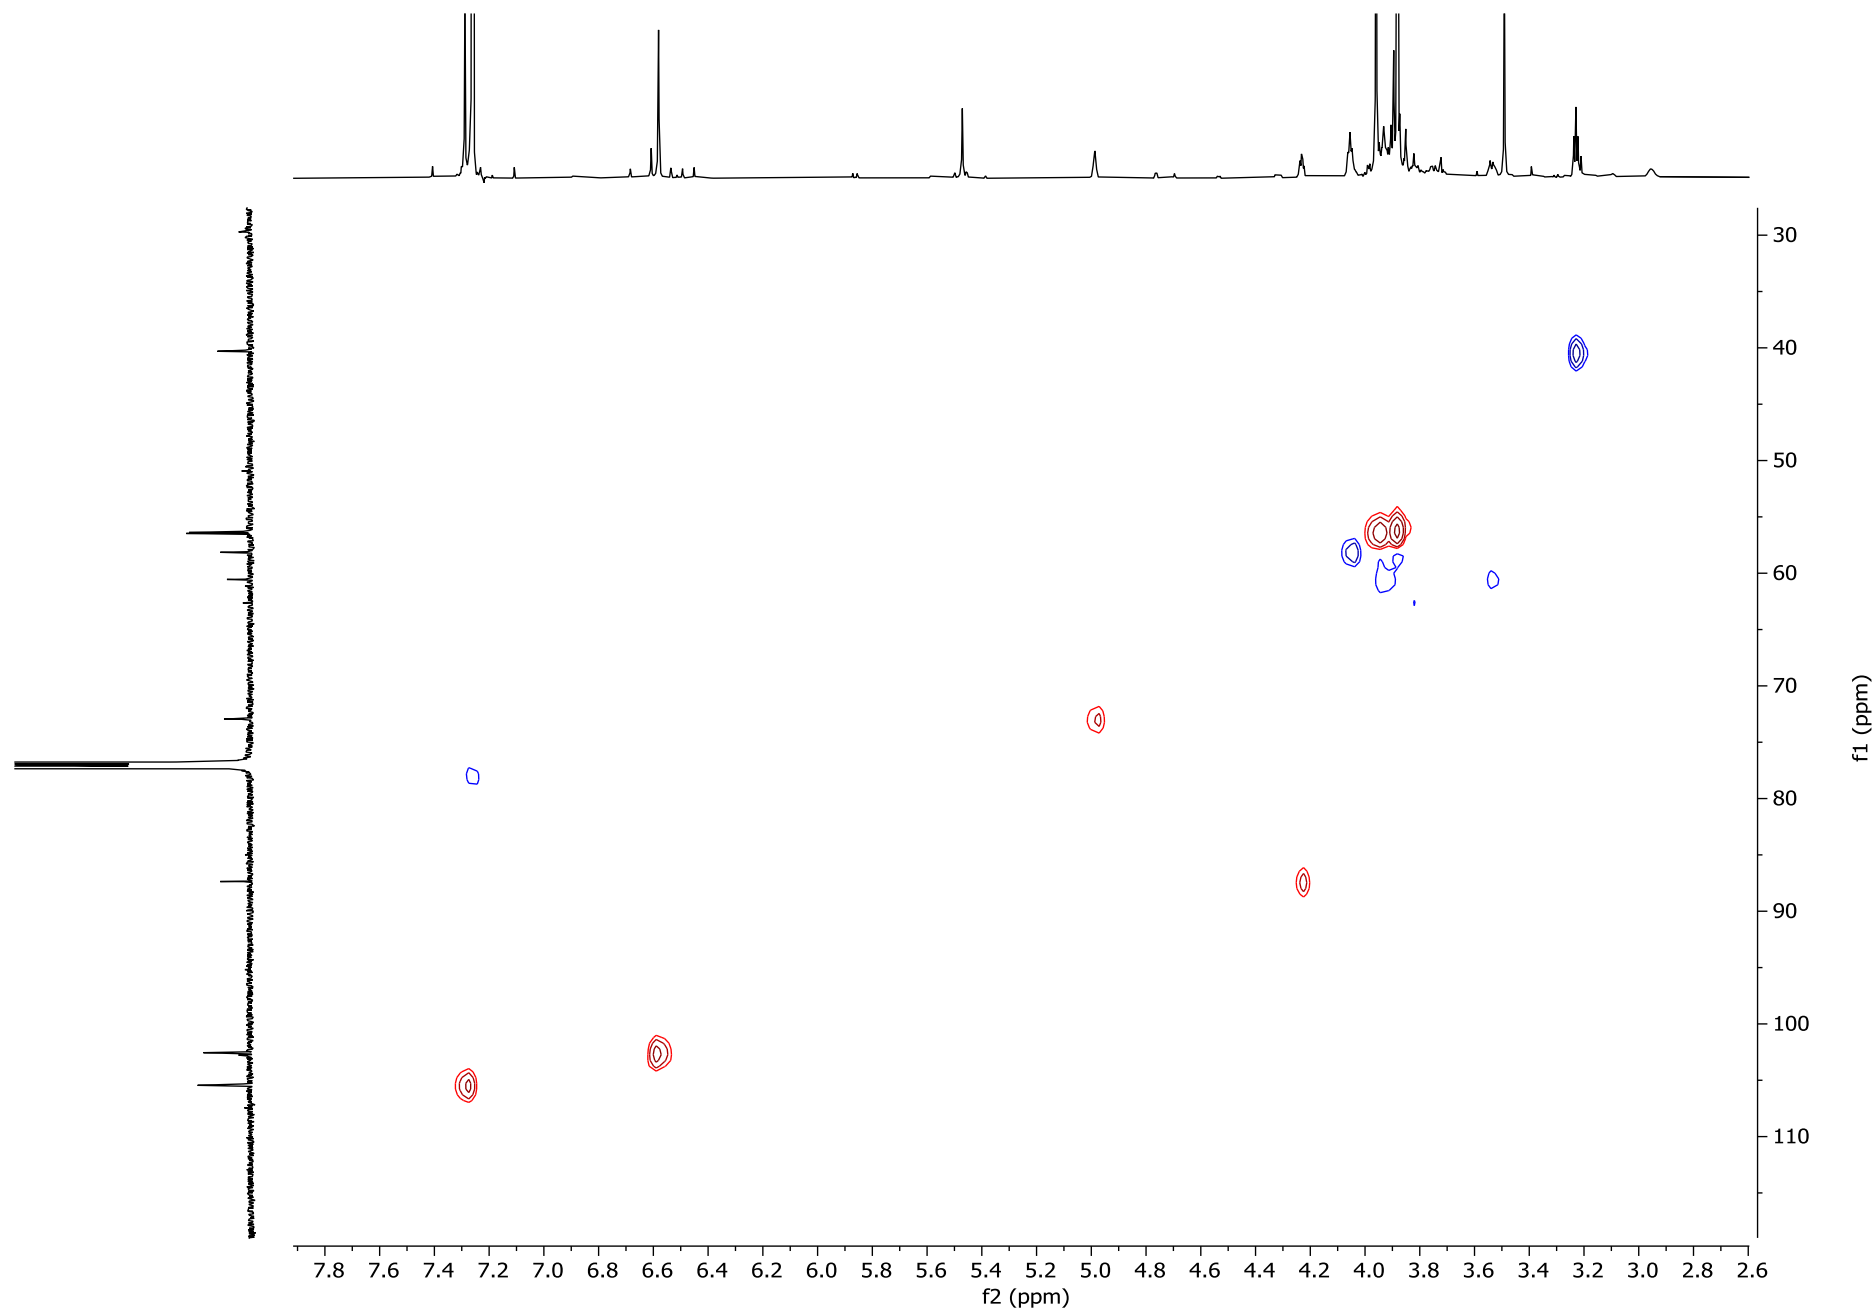

**Figure S7.** HMBC spectrum of **1** in chloroform-*d*

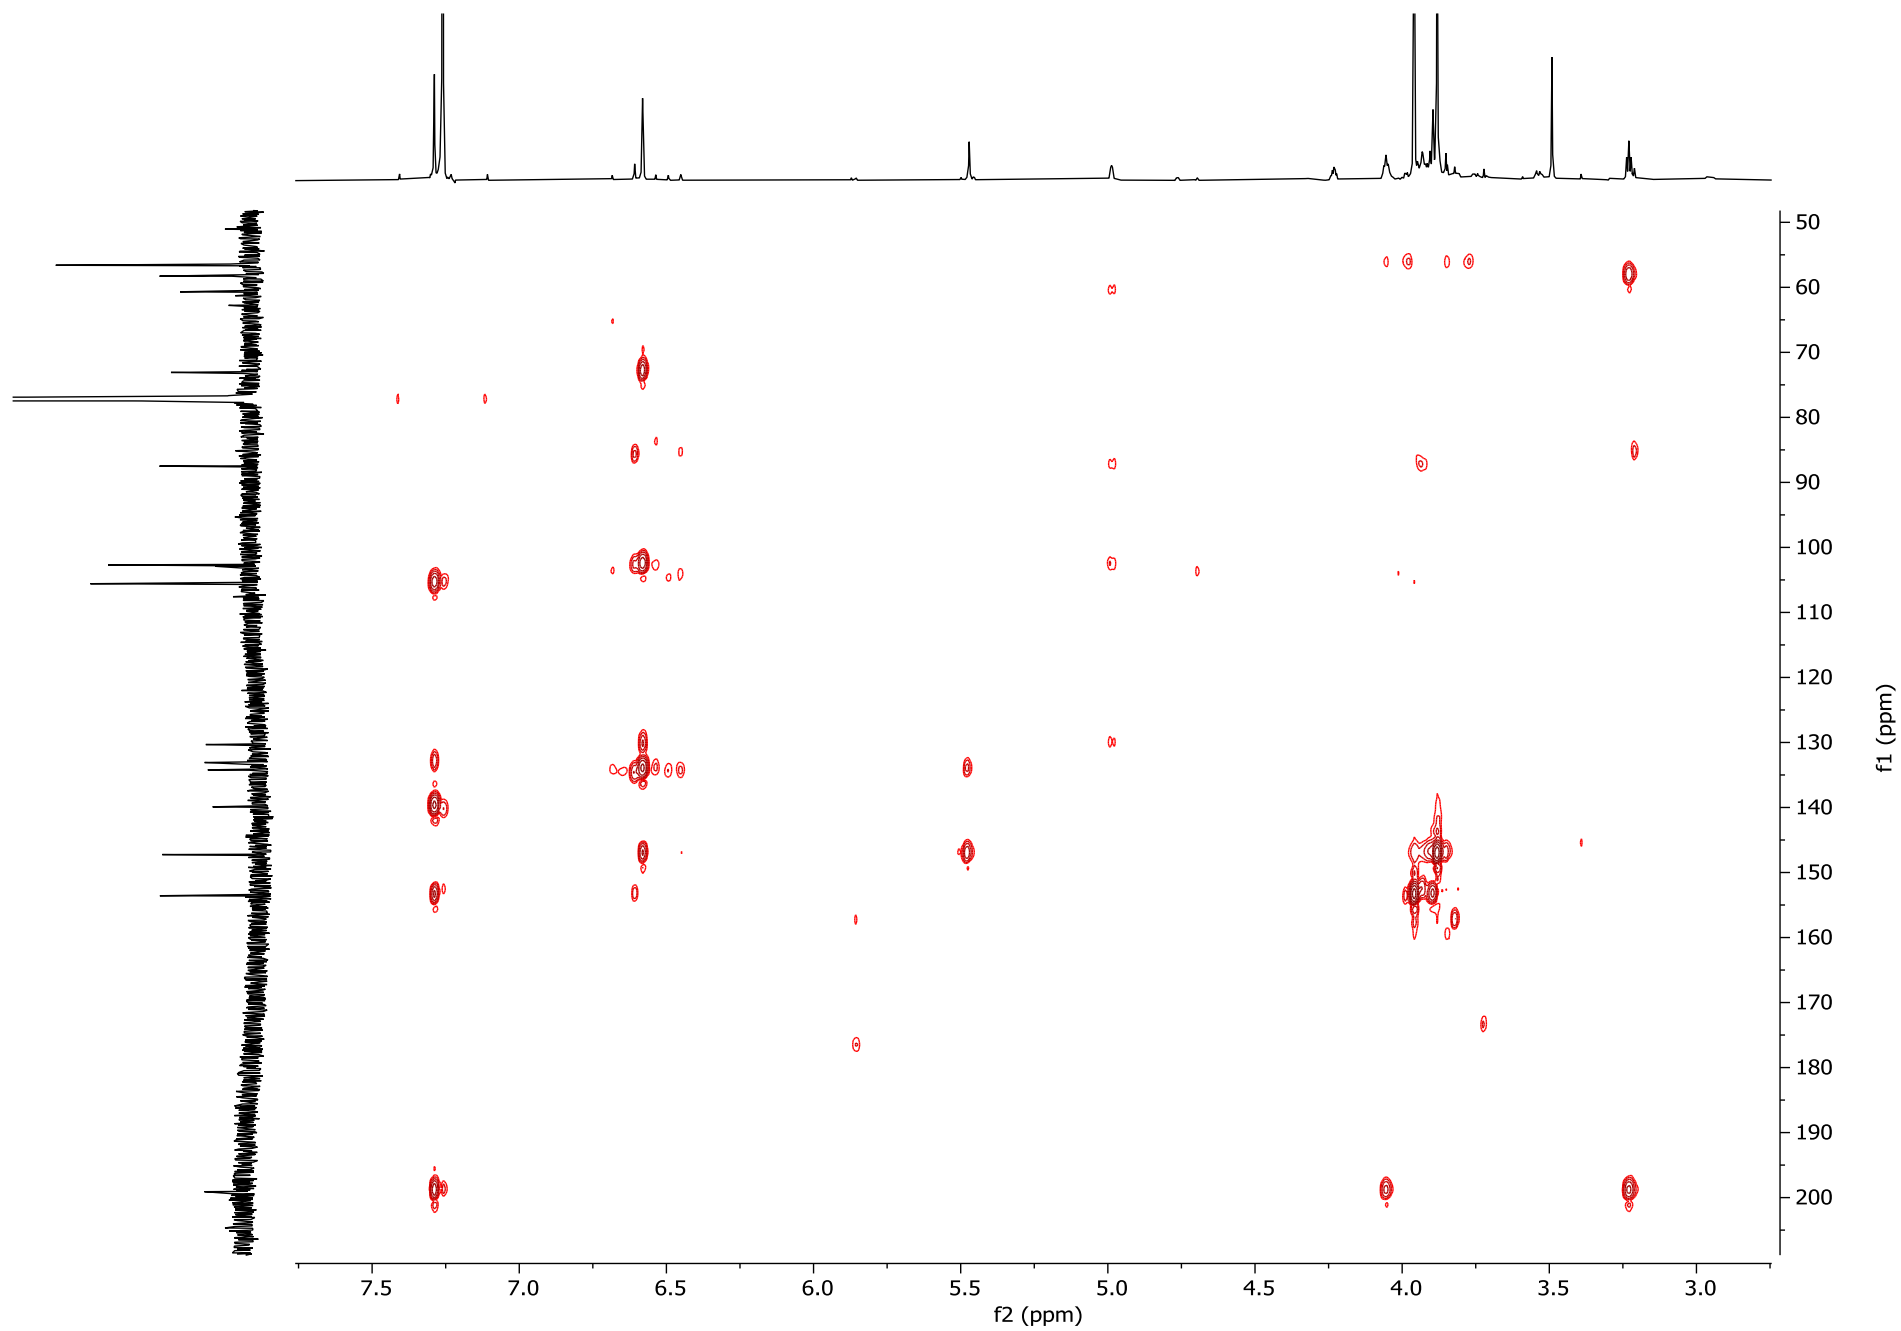

Figure S8. HRFABMS spectrum of 9

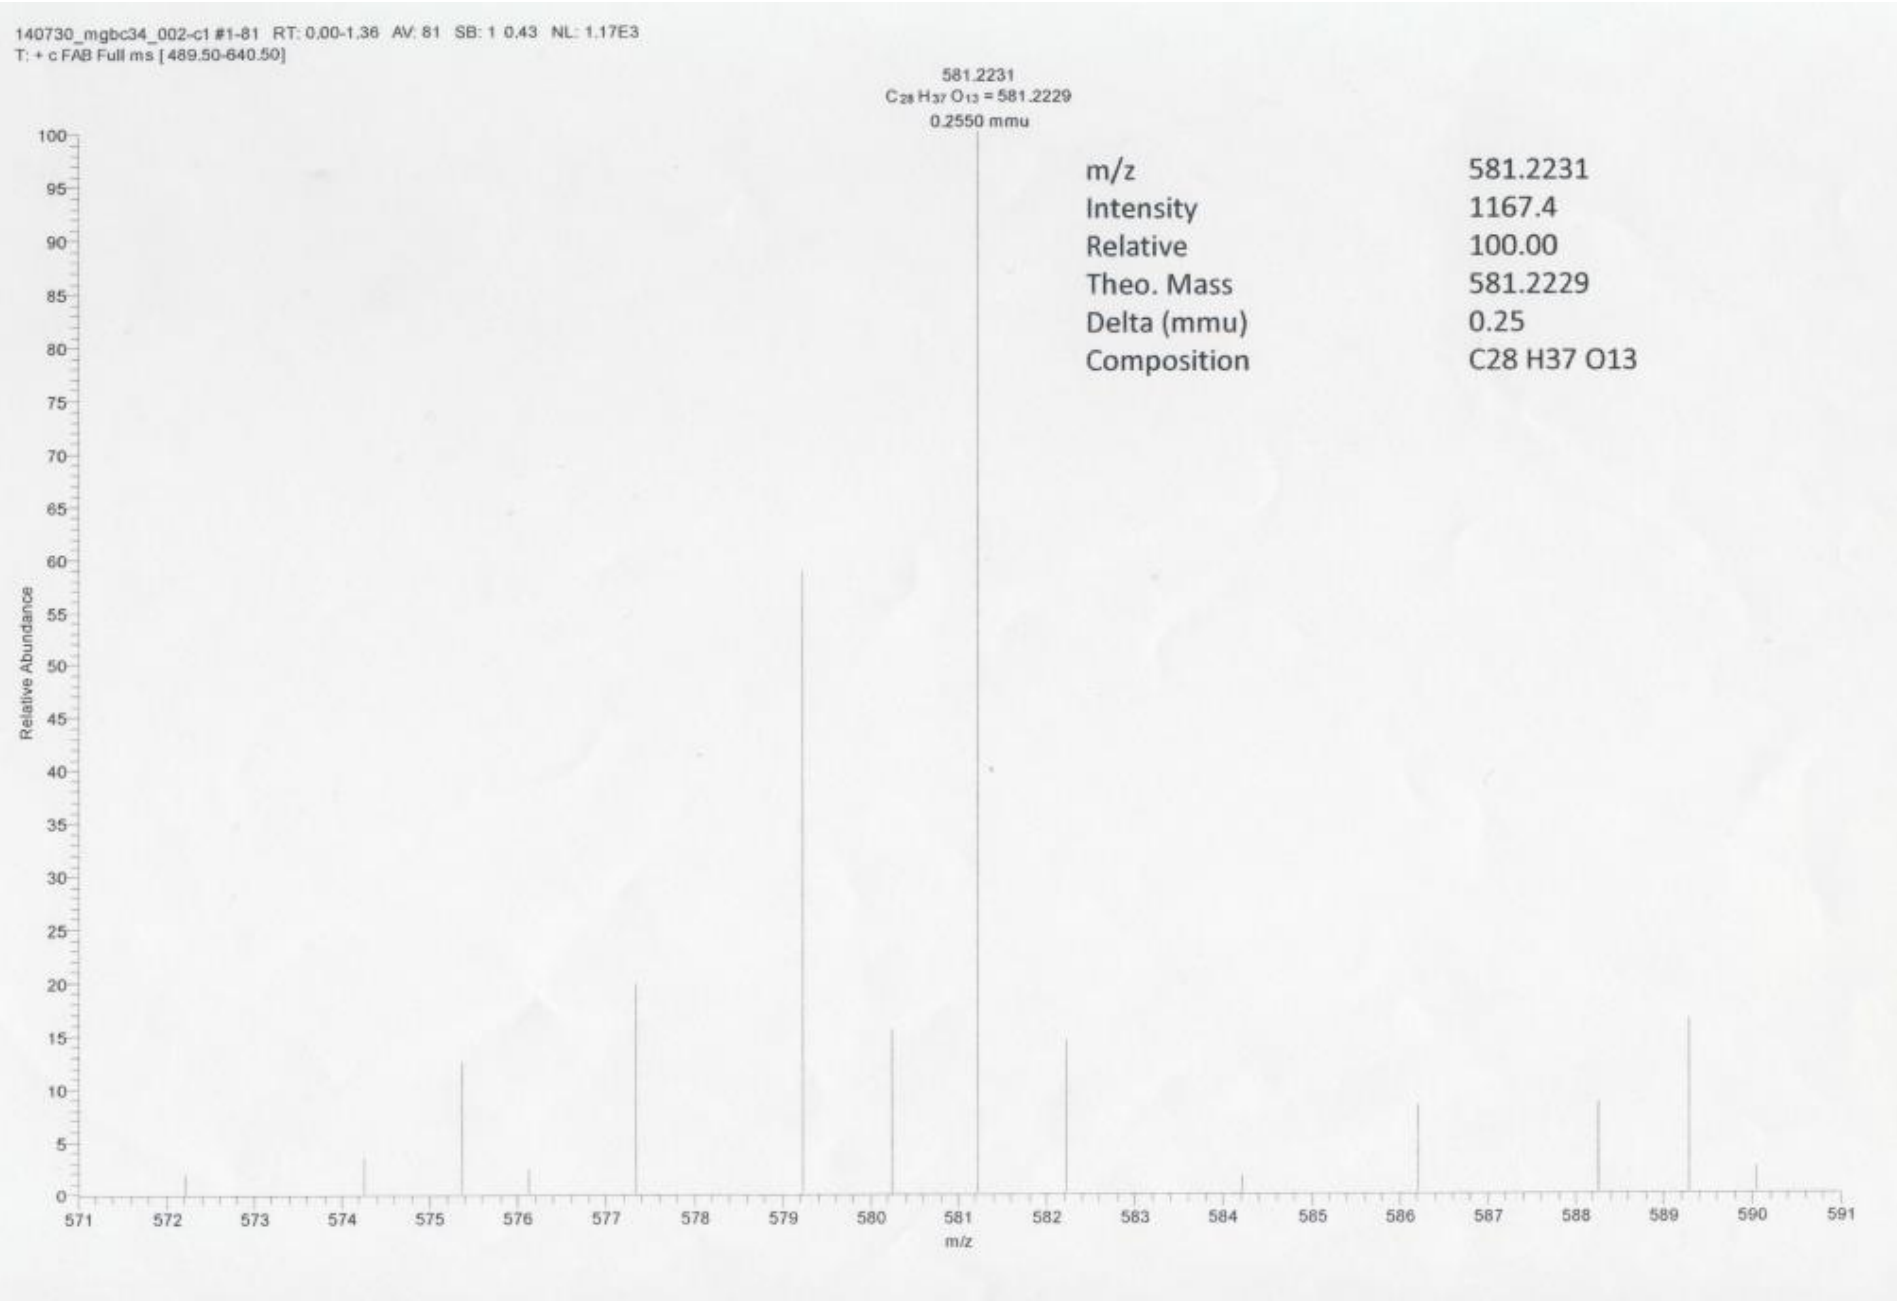

**Figure S9.** ECD spectra of **9** (top) and **25** (bottom, adopted from the original paper).

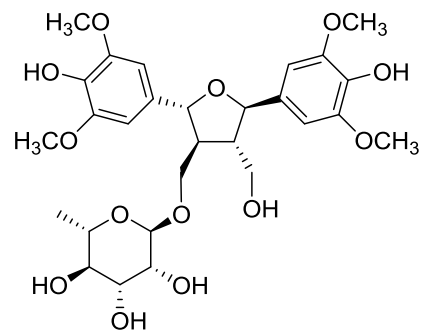

**9**

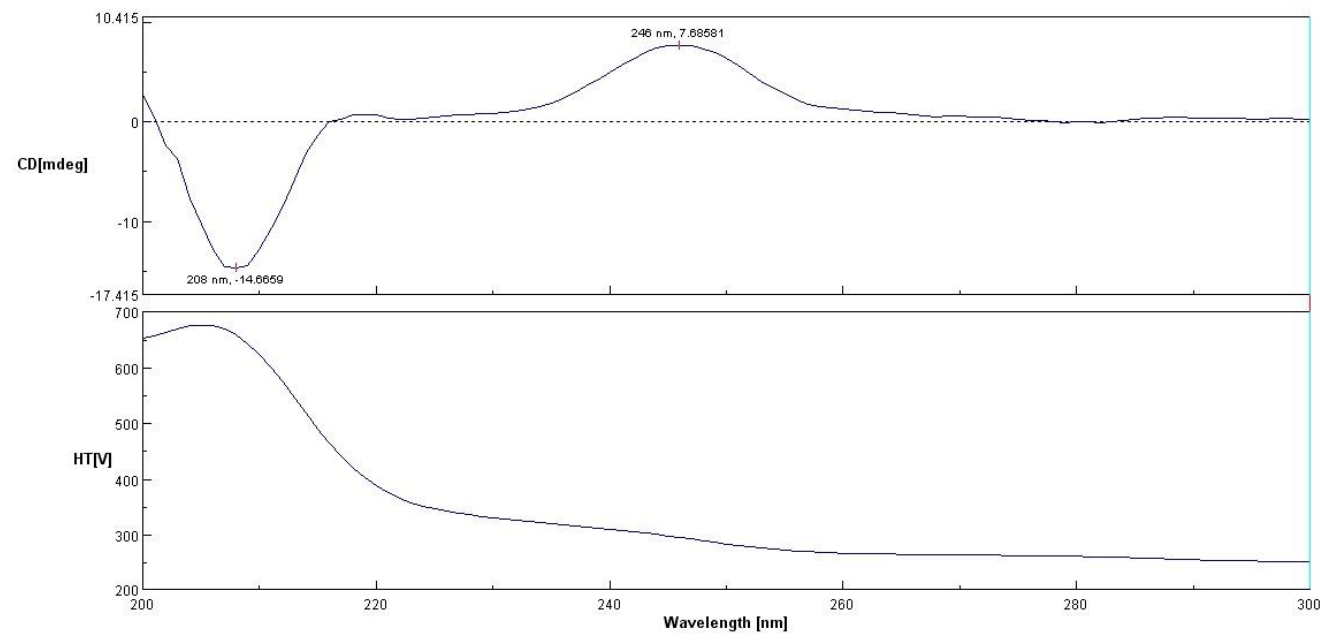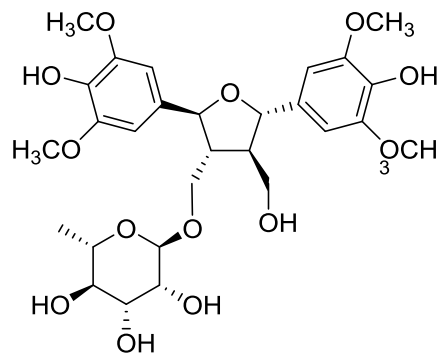

**25**

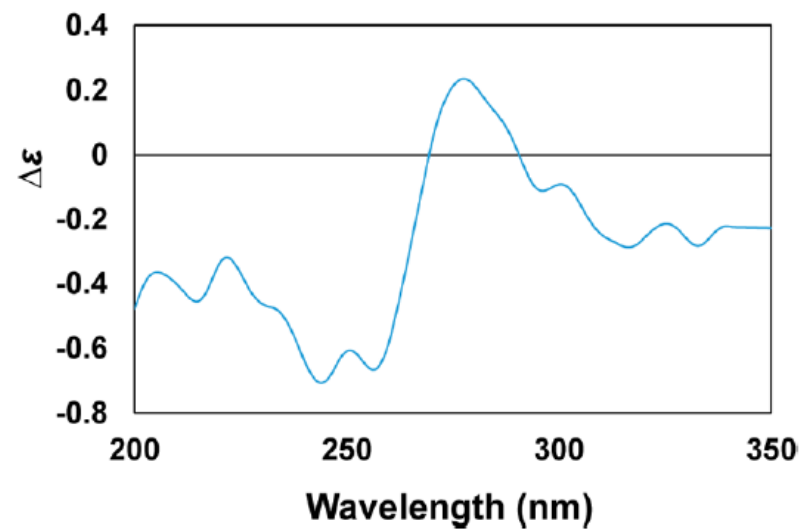

**Figure S10.**  $^1\text{H}$  NMR spectrum of **9** in methanol- $d_4$  (700 MHz)

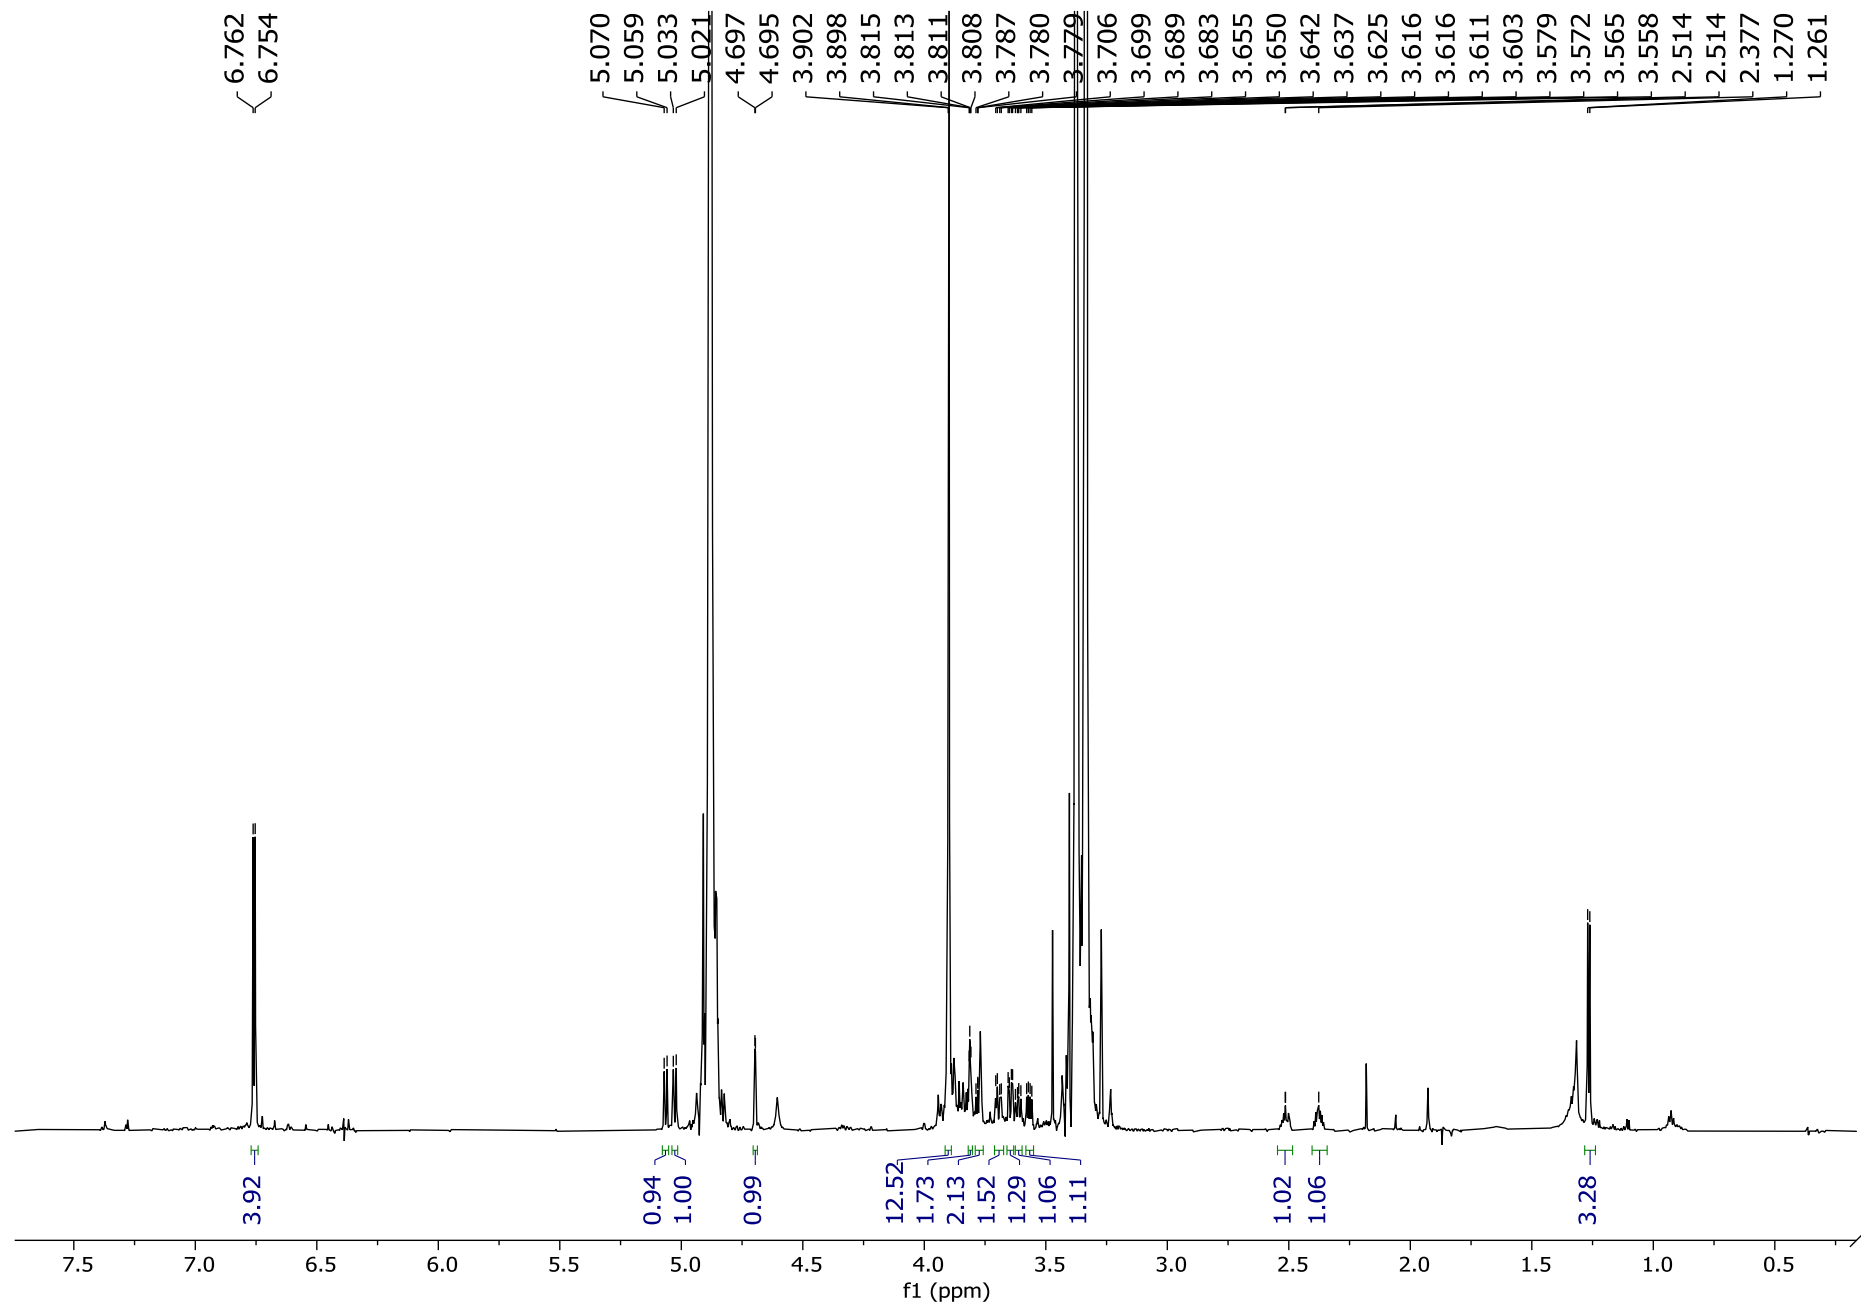

**Figure S11.**  $^{13}\text{C}$  NMR spectrum of **9** in methanol- $d_4$  (175 MHz)

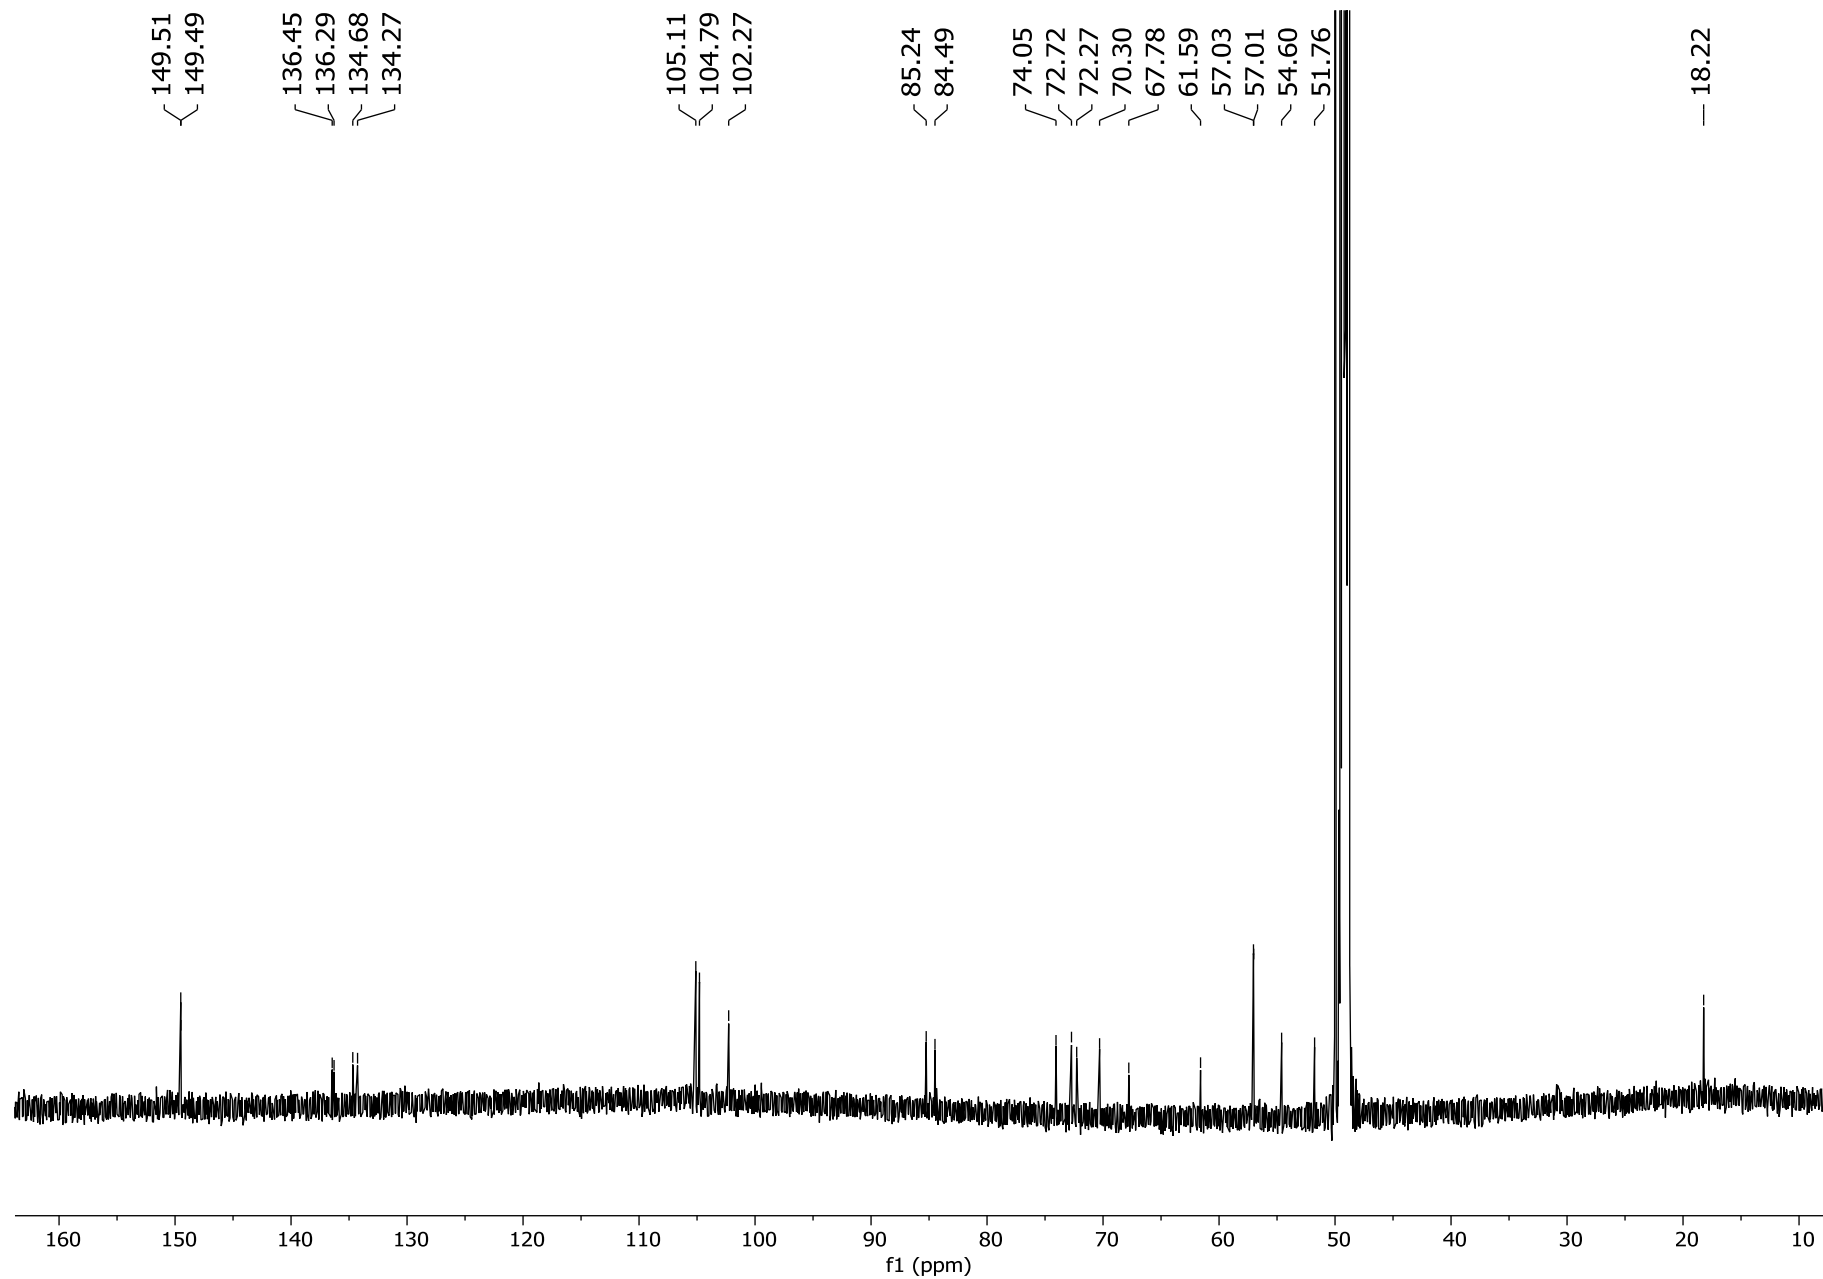

**Figure S12.**  $^1\text{H}$ - $^1\text{H}$  COSY spectrum of **9** in methanol- $d_4$

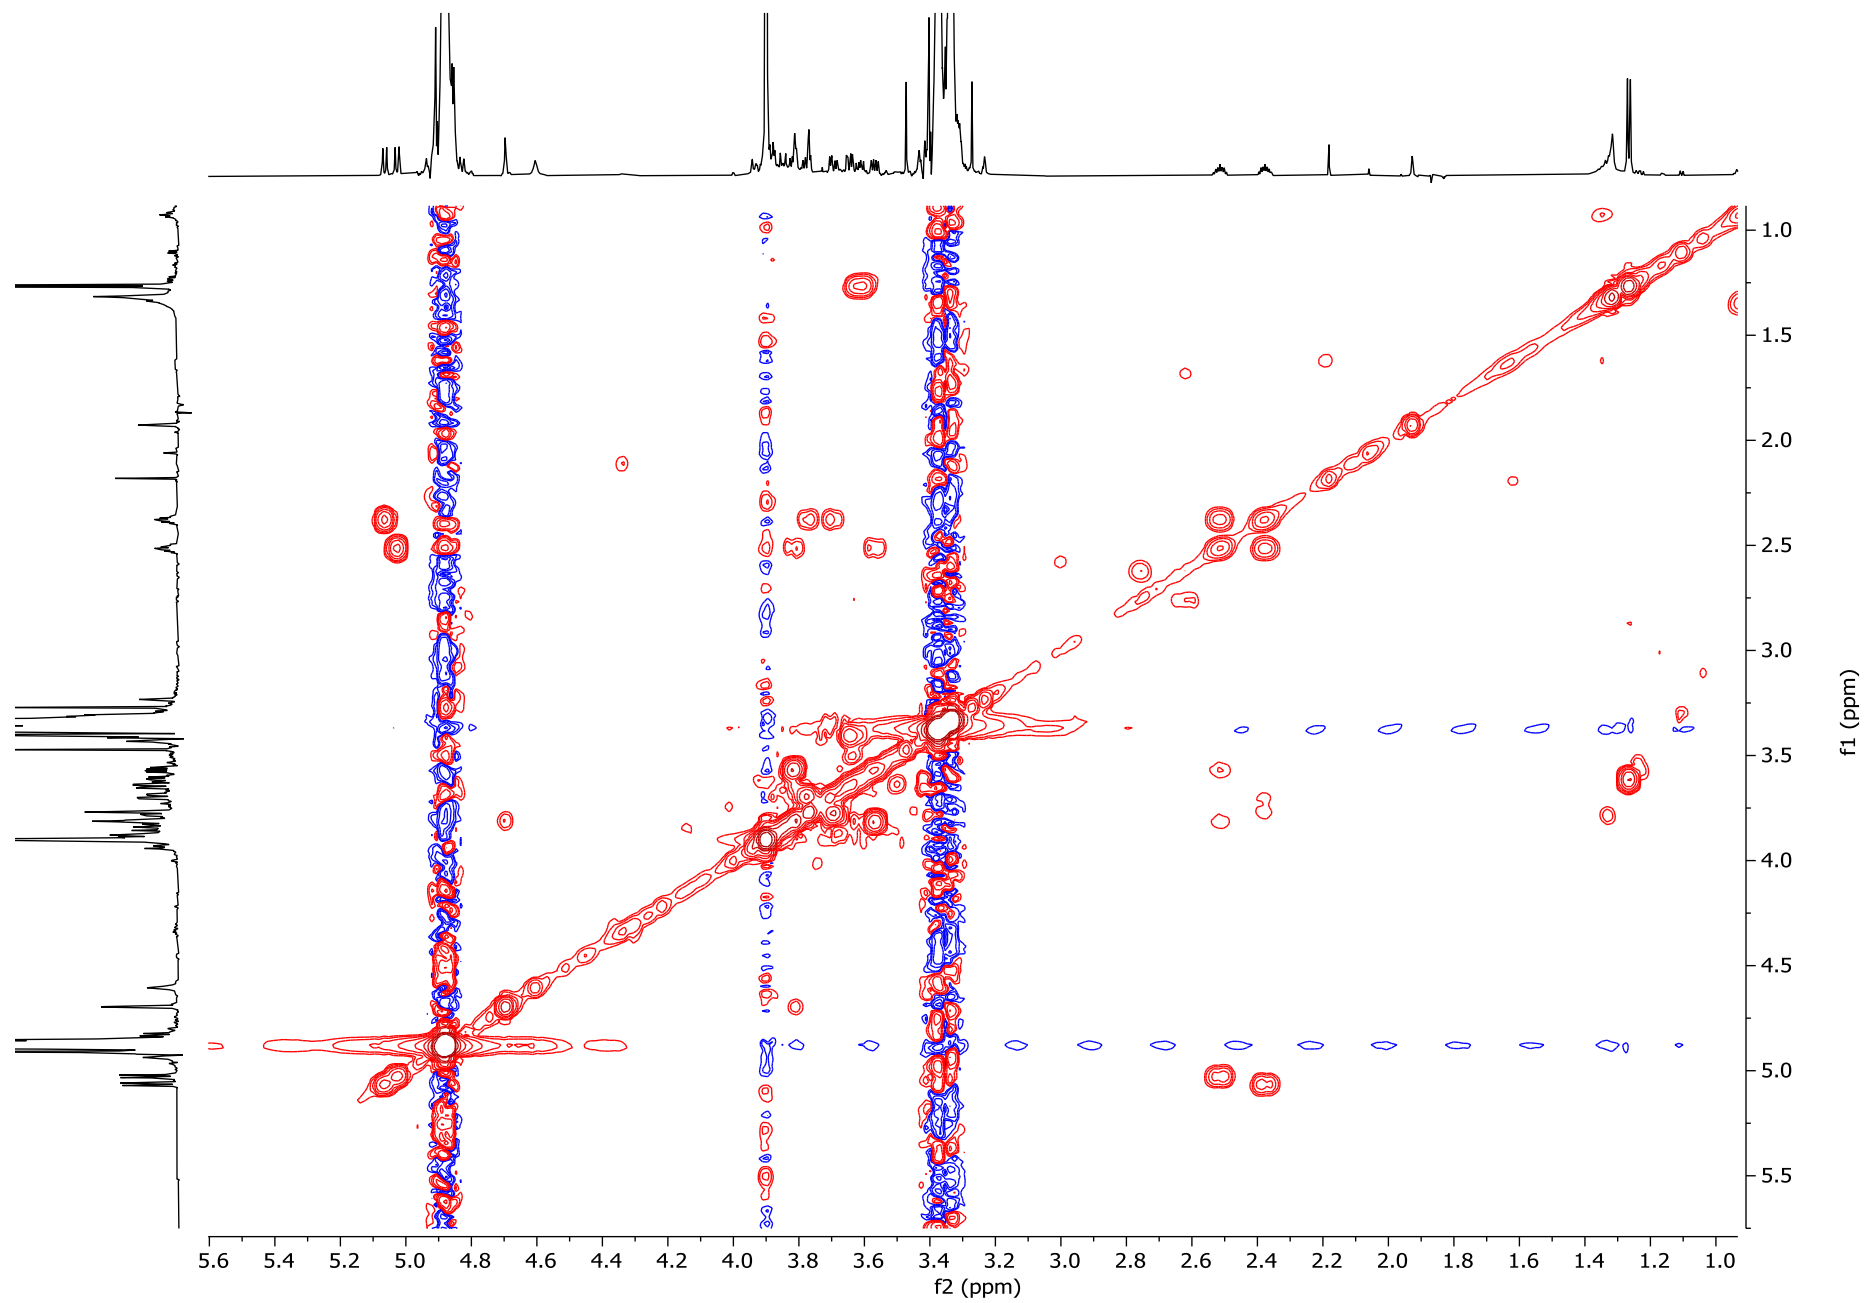

**Figure S13.** HSQC spectrum of **9** in methanol-*d*<sub>4</sub>

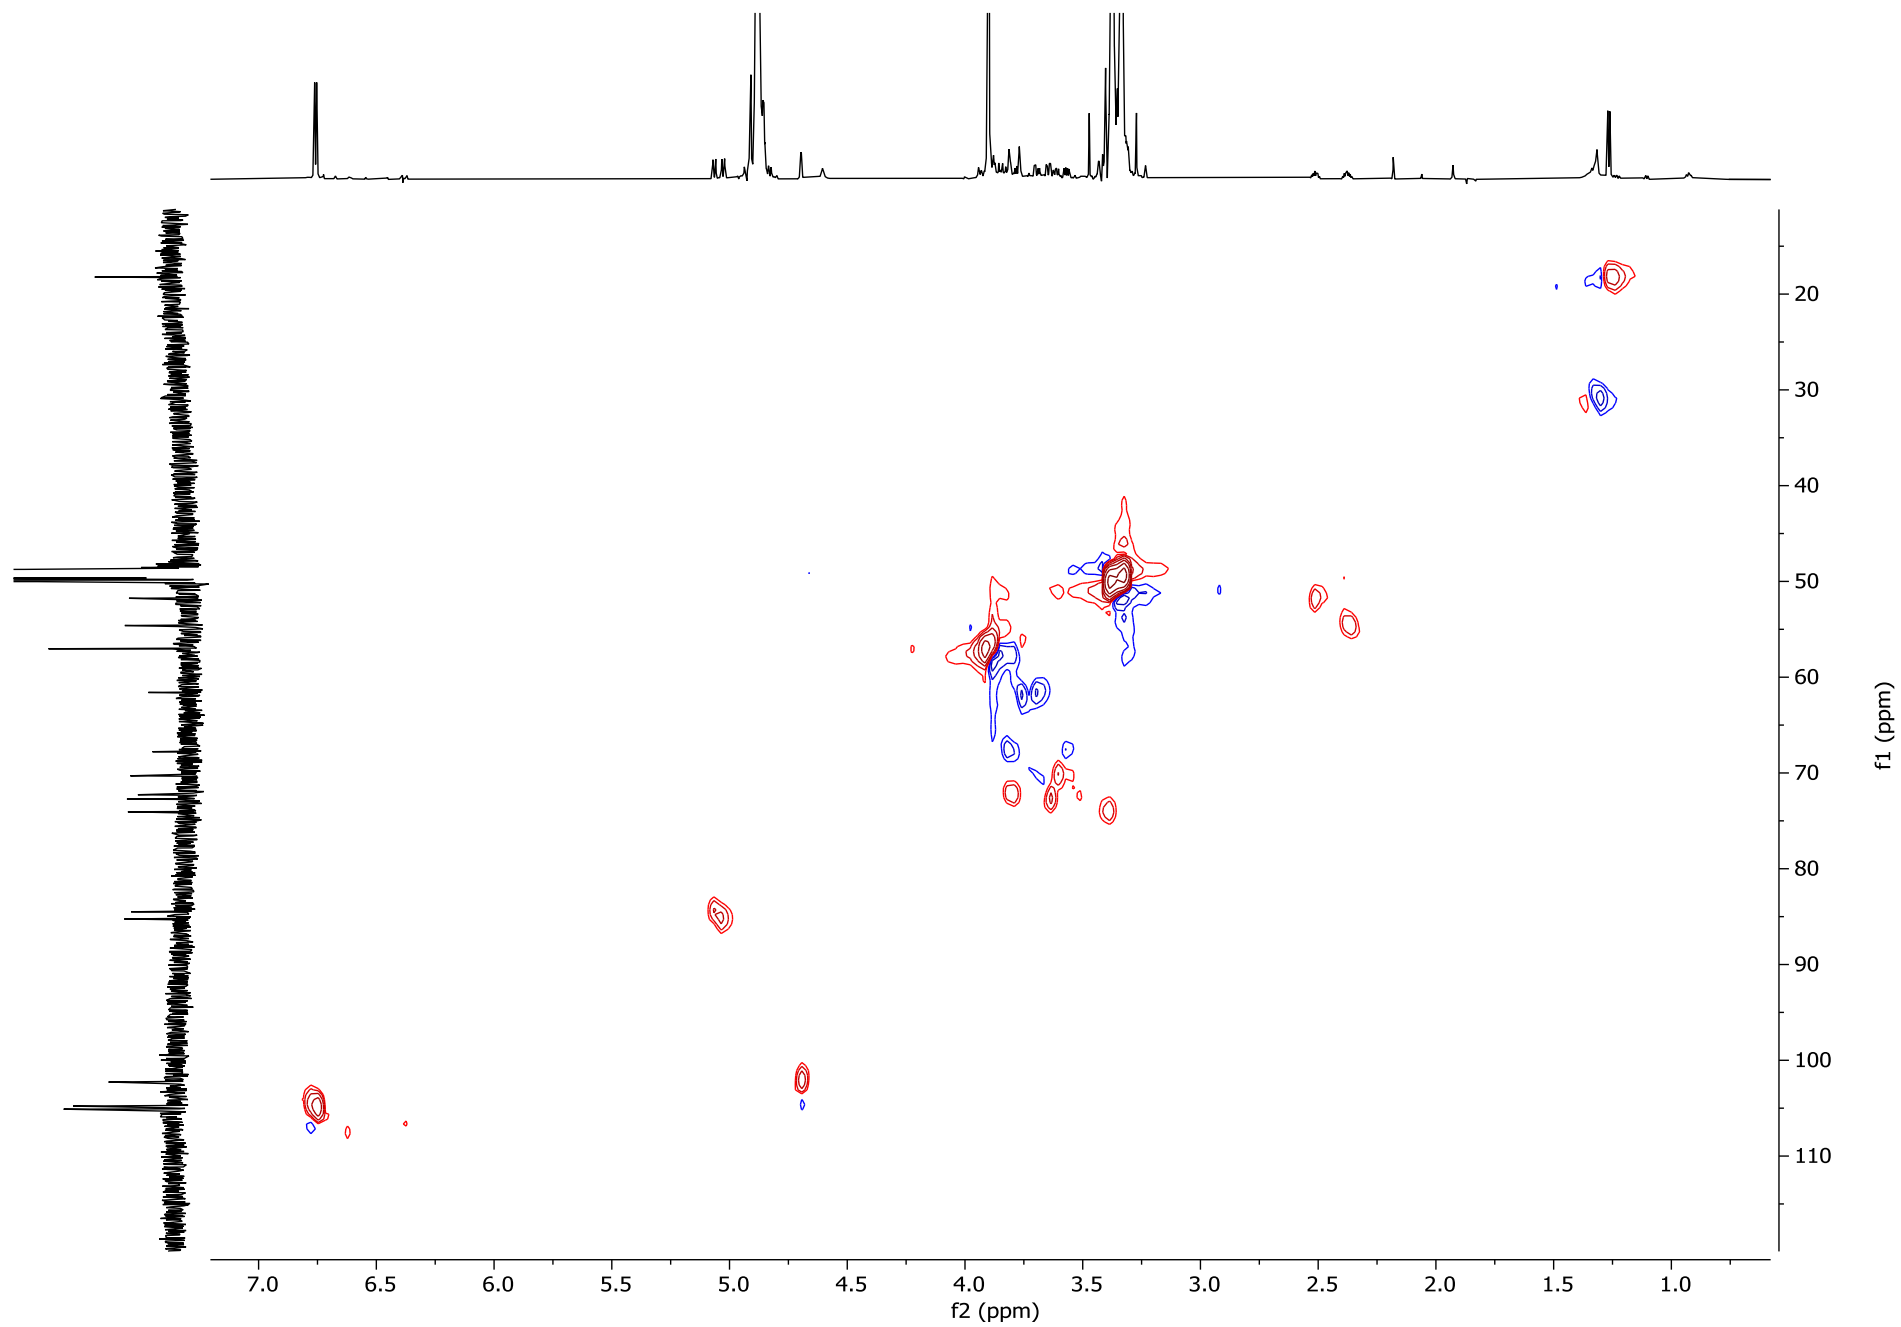

**Figure S14.** HMBC spectrum of **9** in methanol- $d_4$

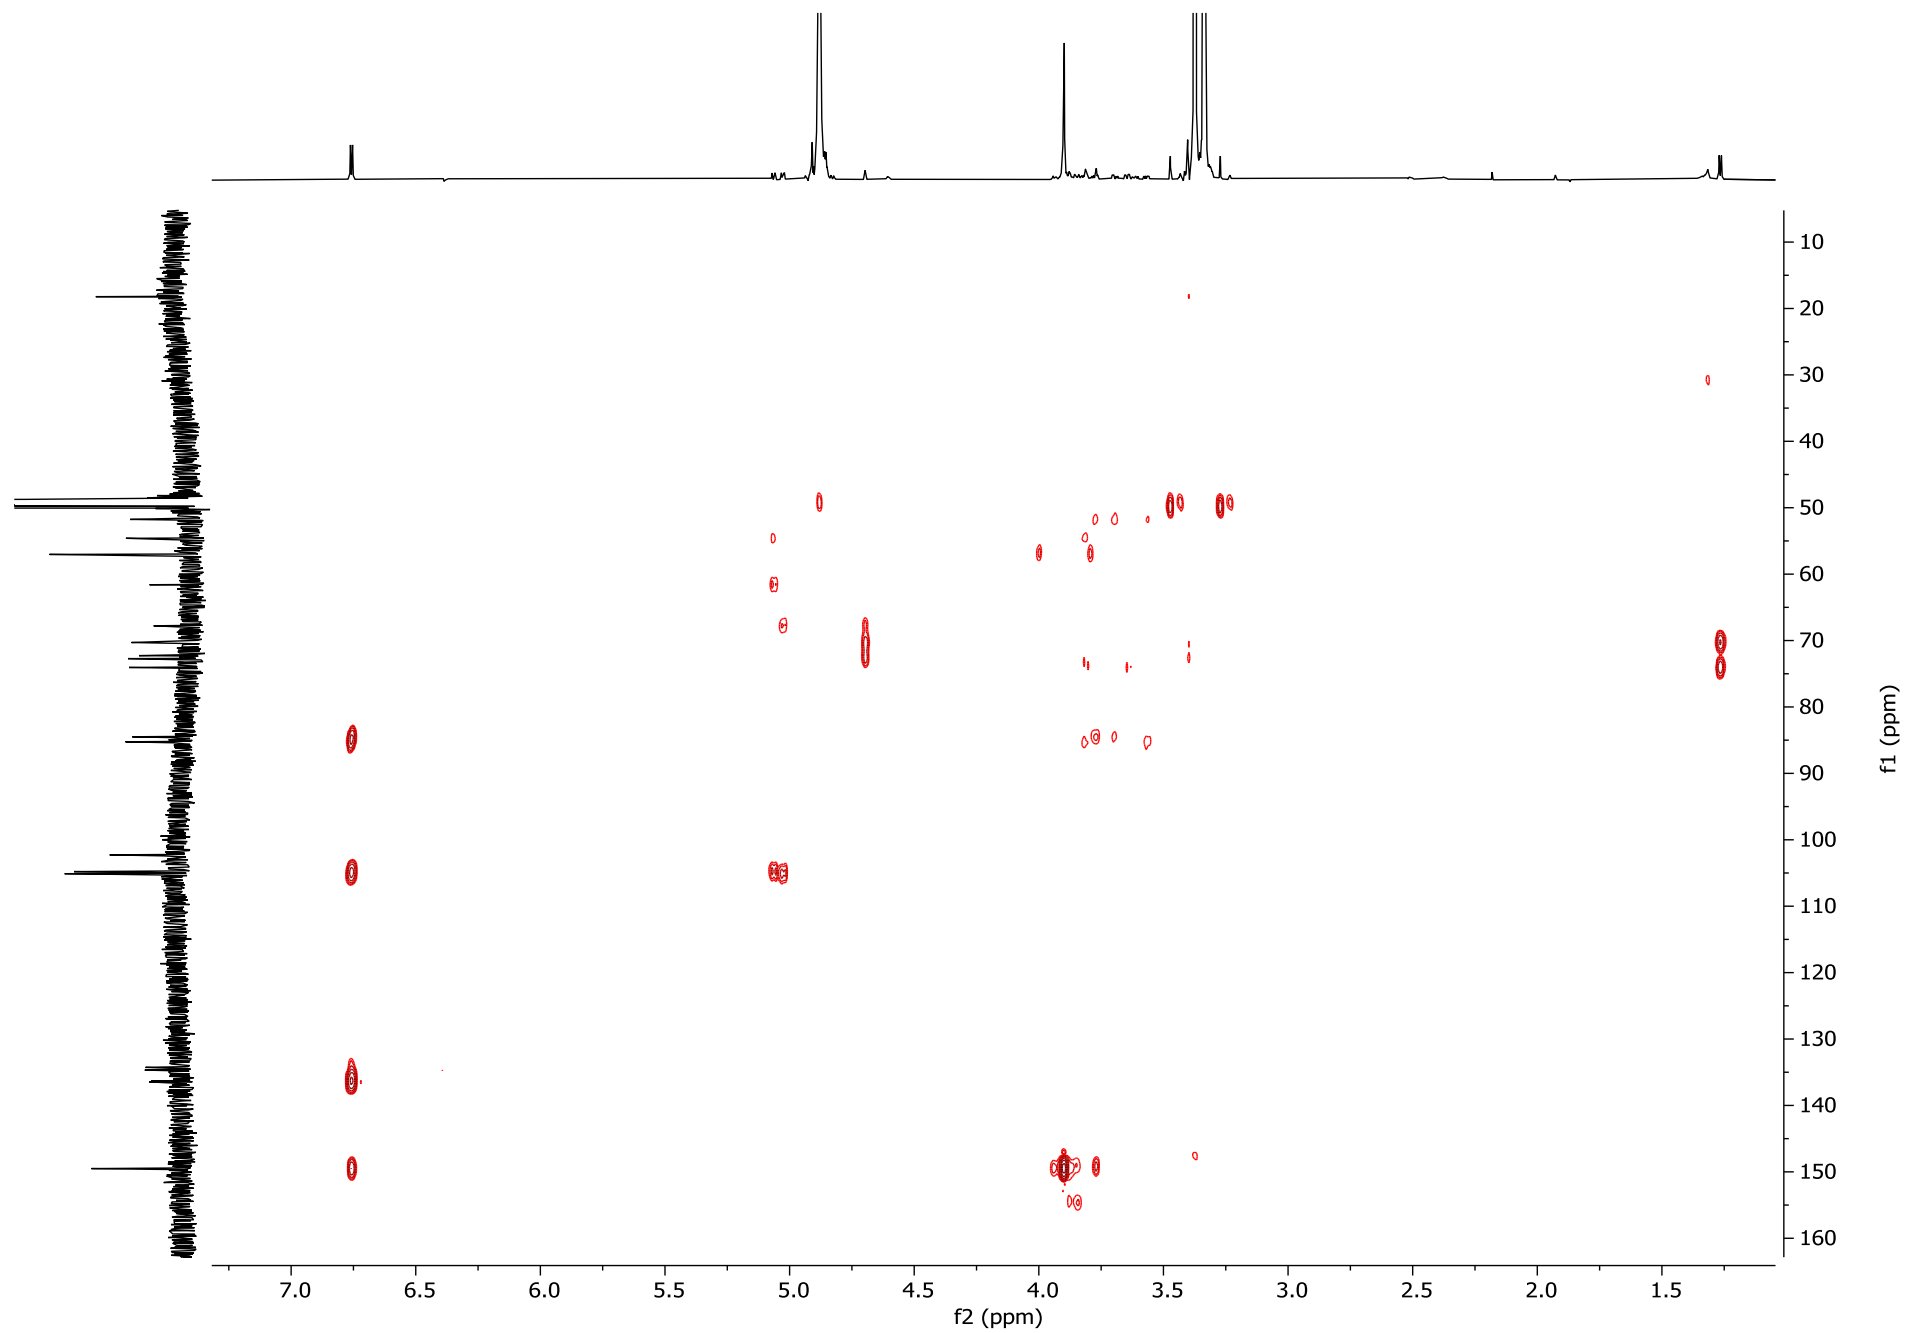

**Figure S15.** Extracted ion chromatograms (EICs,  $m/z$  431.1311) of chiral derivatized L- and D-rhamnopyranose purchased or obtained by hydrolysis of **9**.

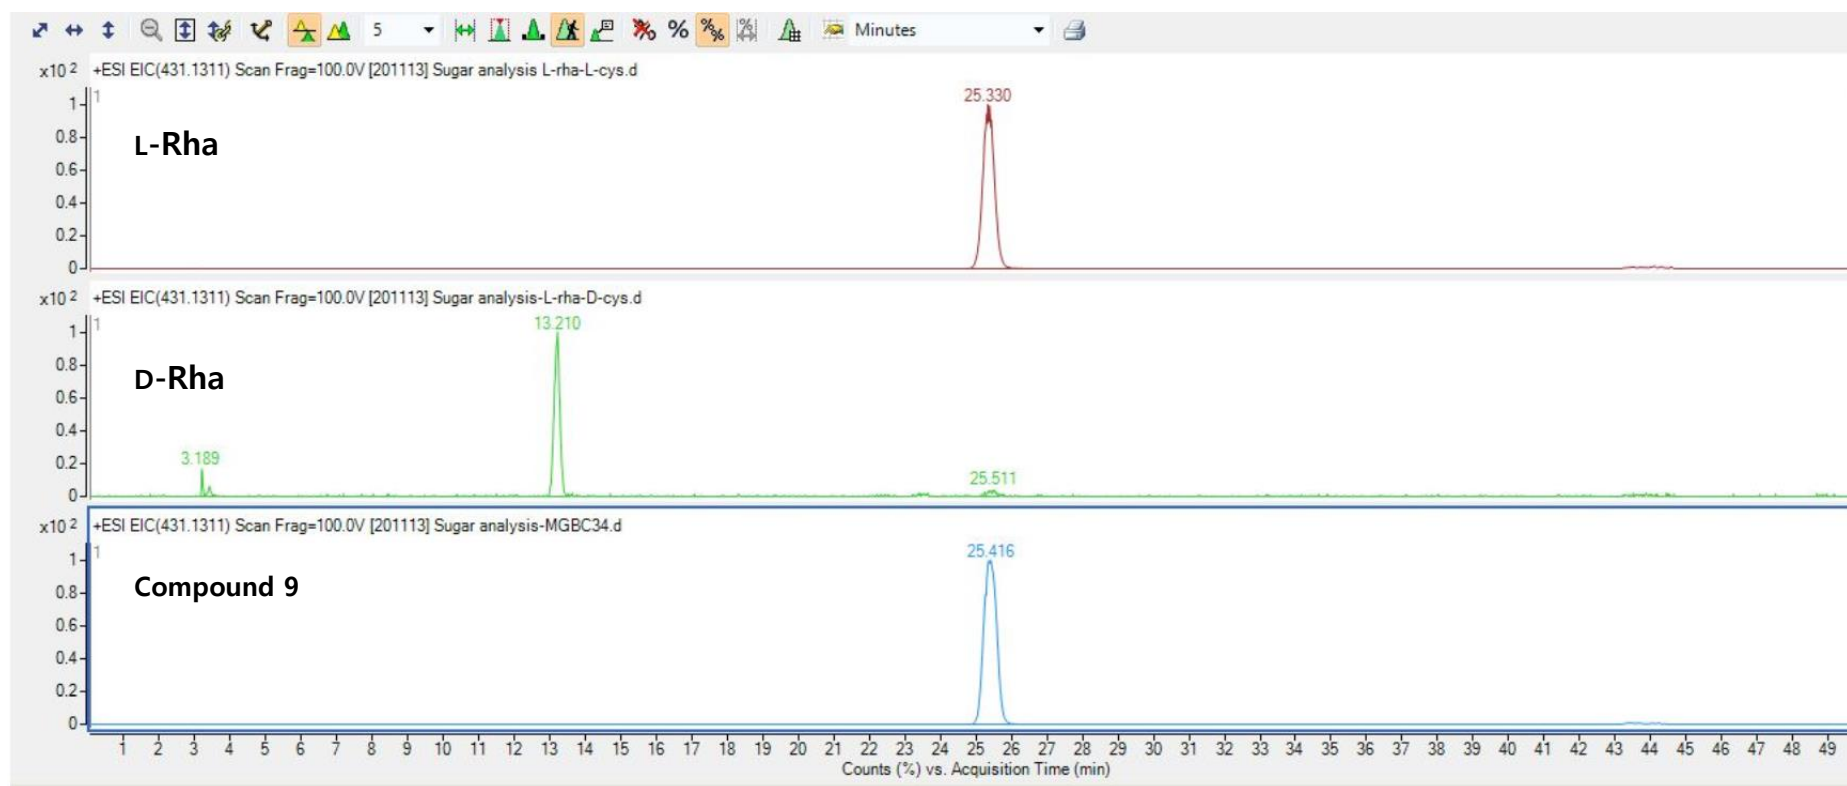

Figure S16. HRESIMS spectrum of 11

140925\_MGBC2\_005-c2 #143-152 RT: 2.47-2.63 AV: 10 SB: 1 3.26 NL: 1.48E5  
T: + c FAB Full ms [ 319.50-470.50]

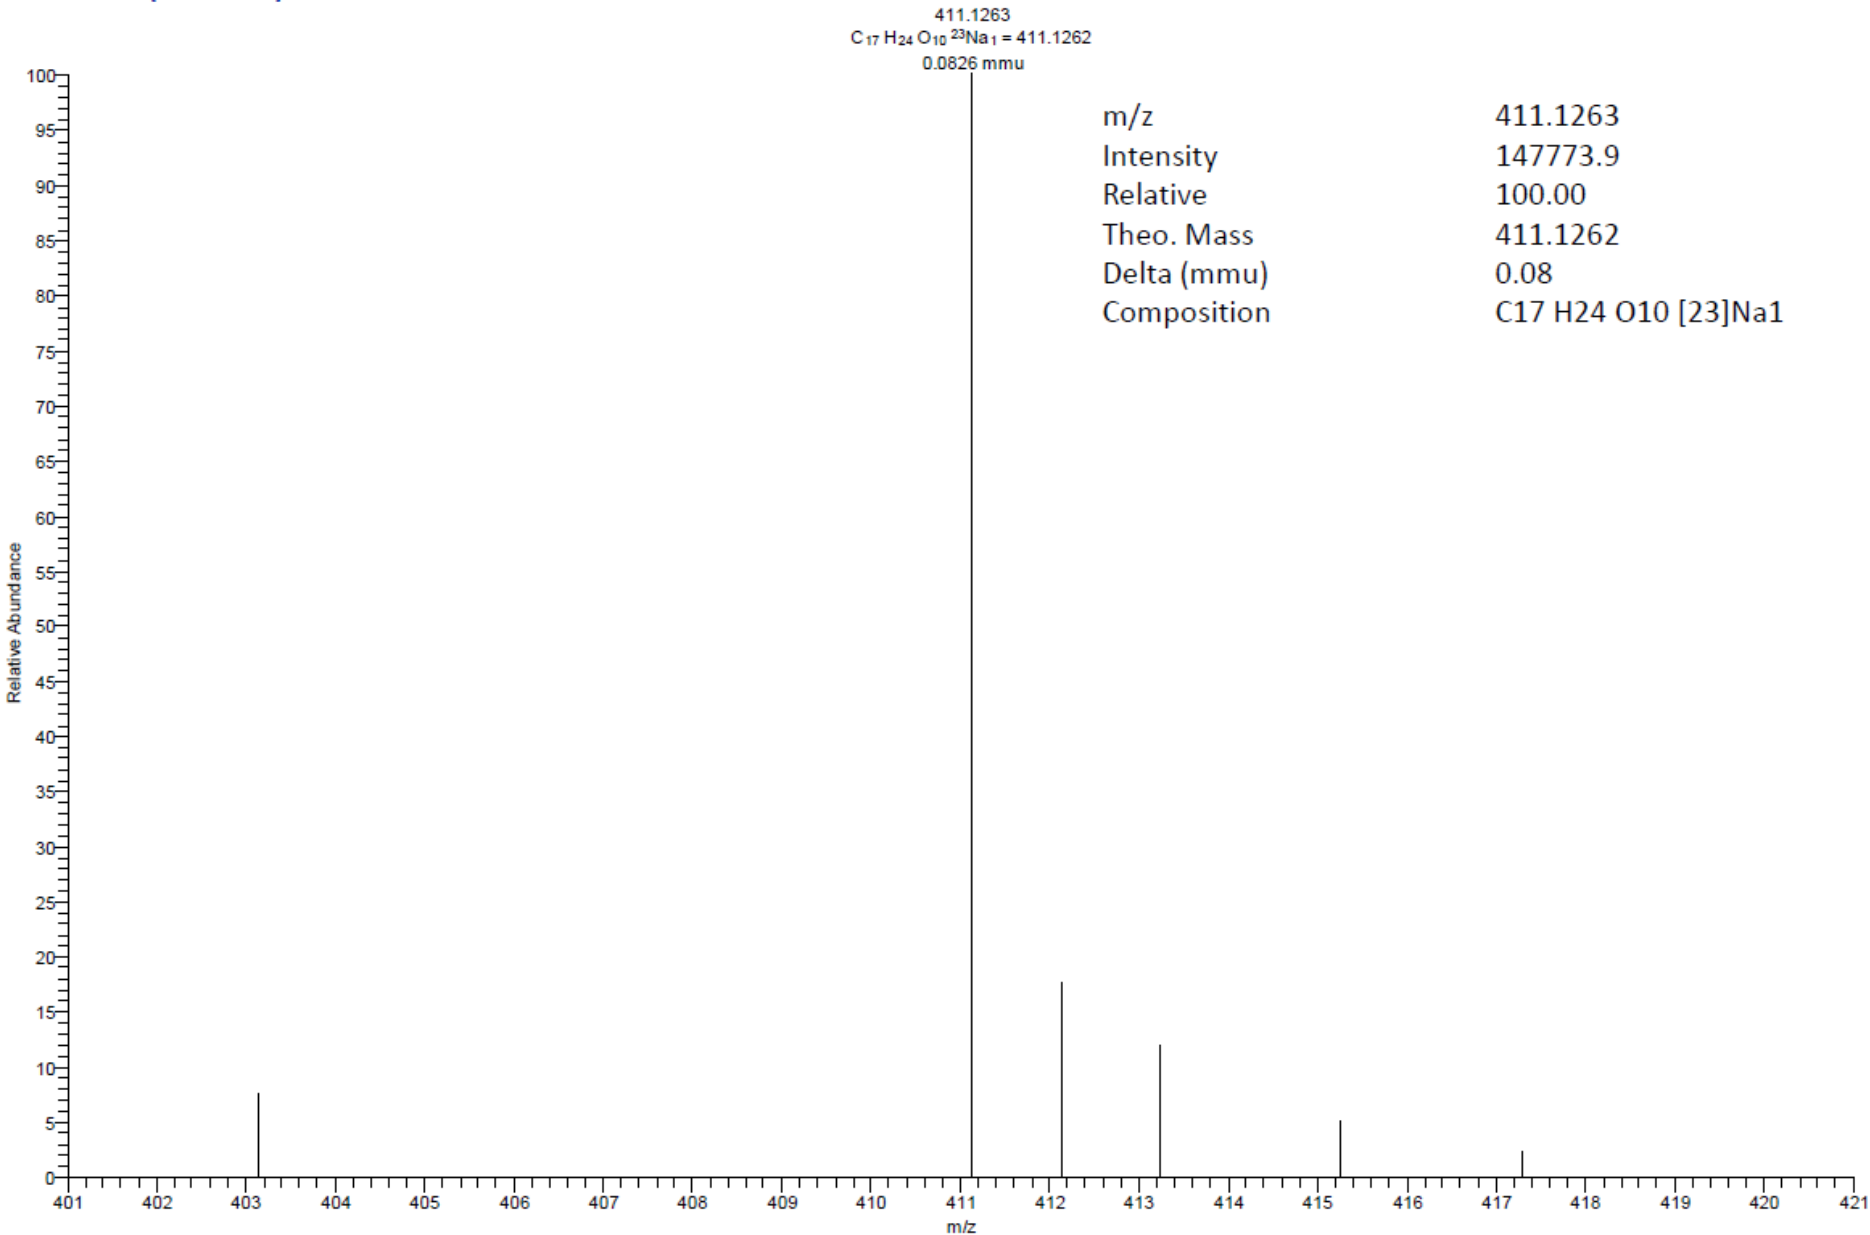

**Figure S17.**  $^1\text{H}$  NMR spectrum of **11** in methanol- $d_4$  (700 MHz)

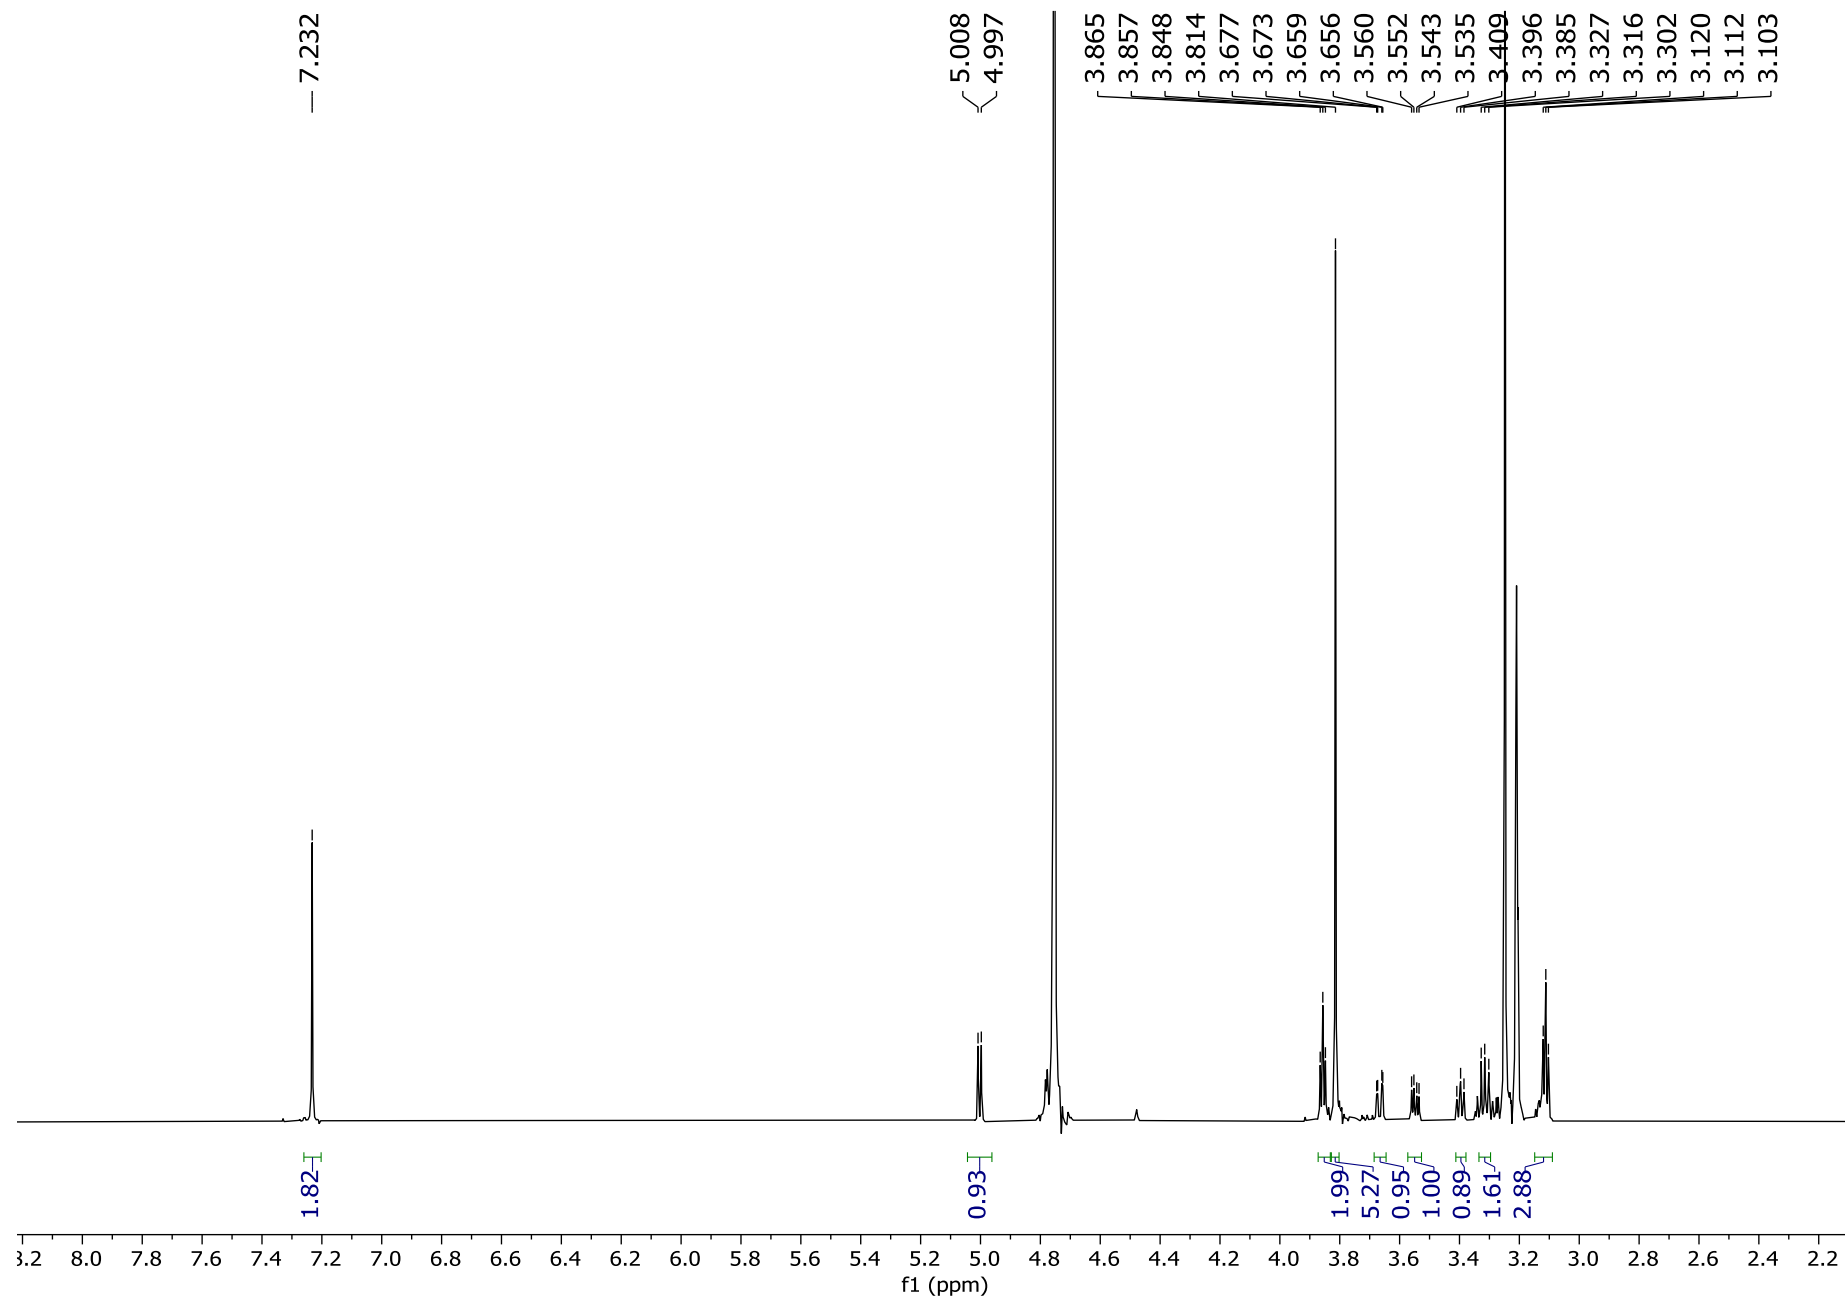

**Figure S18.**  $^{13}\text{C}$  NMR spectrum of **11** in methanol- $d_4$  (175 MHz)

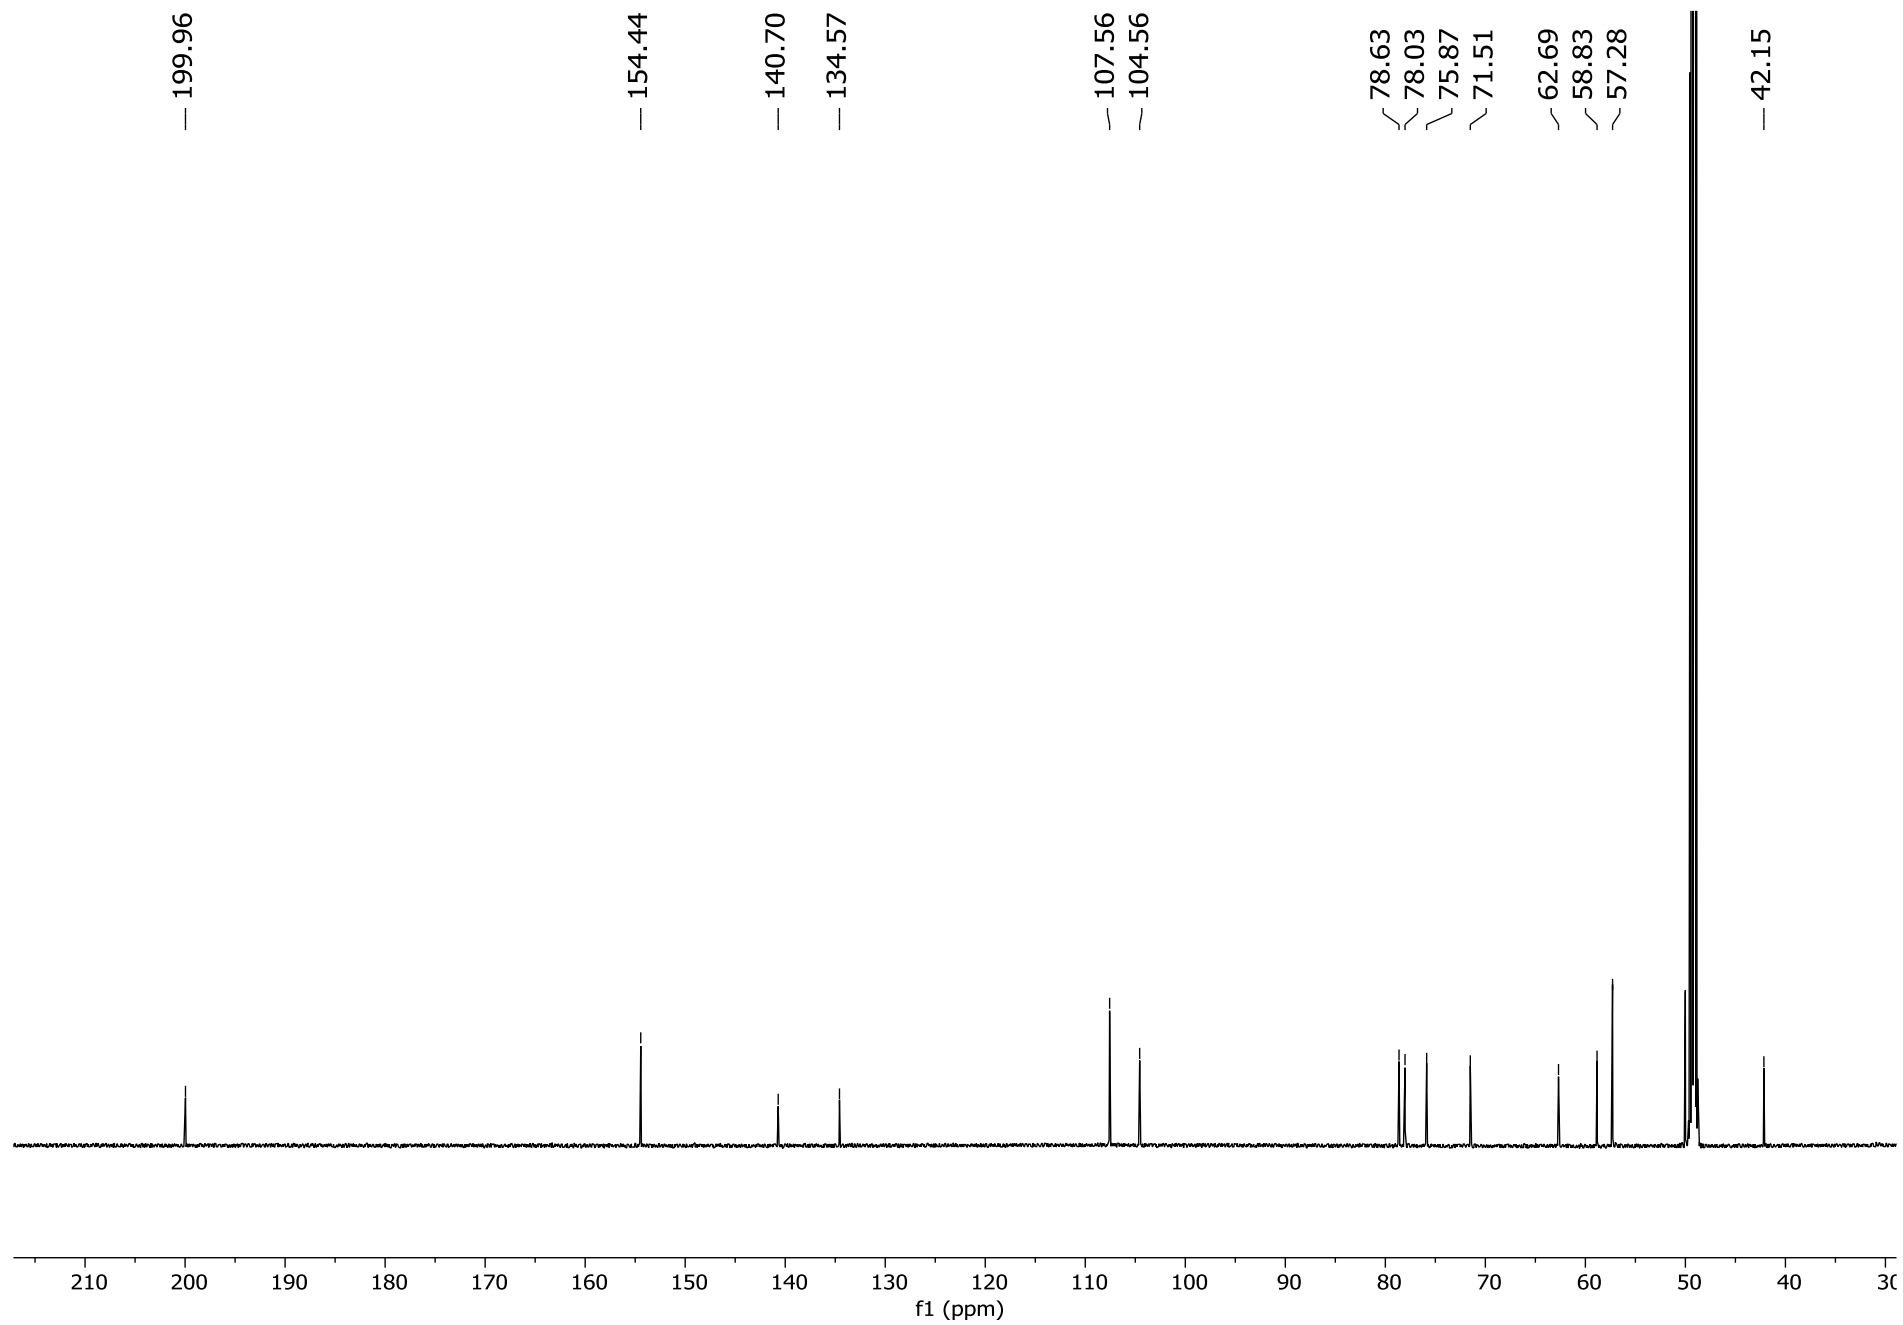

**Figure S19.**  $^1\text{H}$ - $^1\text{H}$  COSY spectrum of **11** in methanol- $d_4$

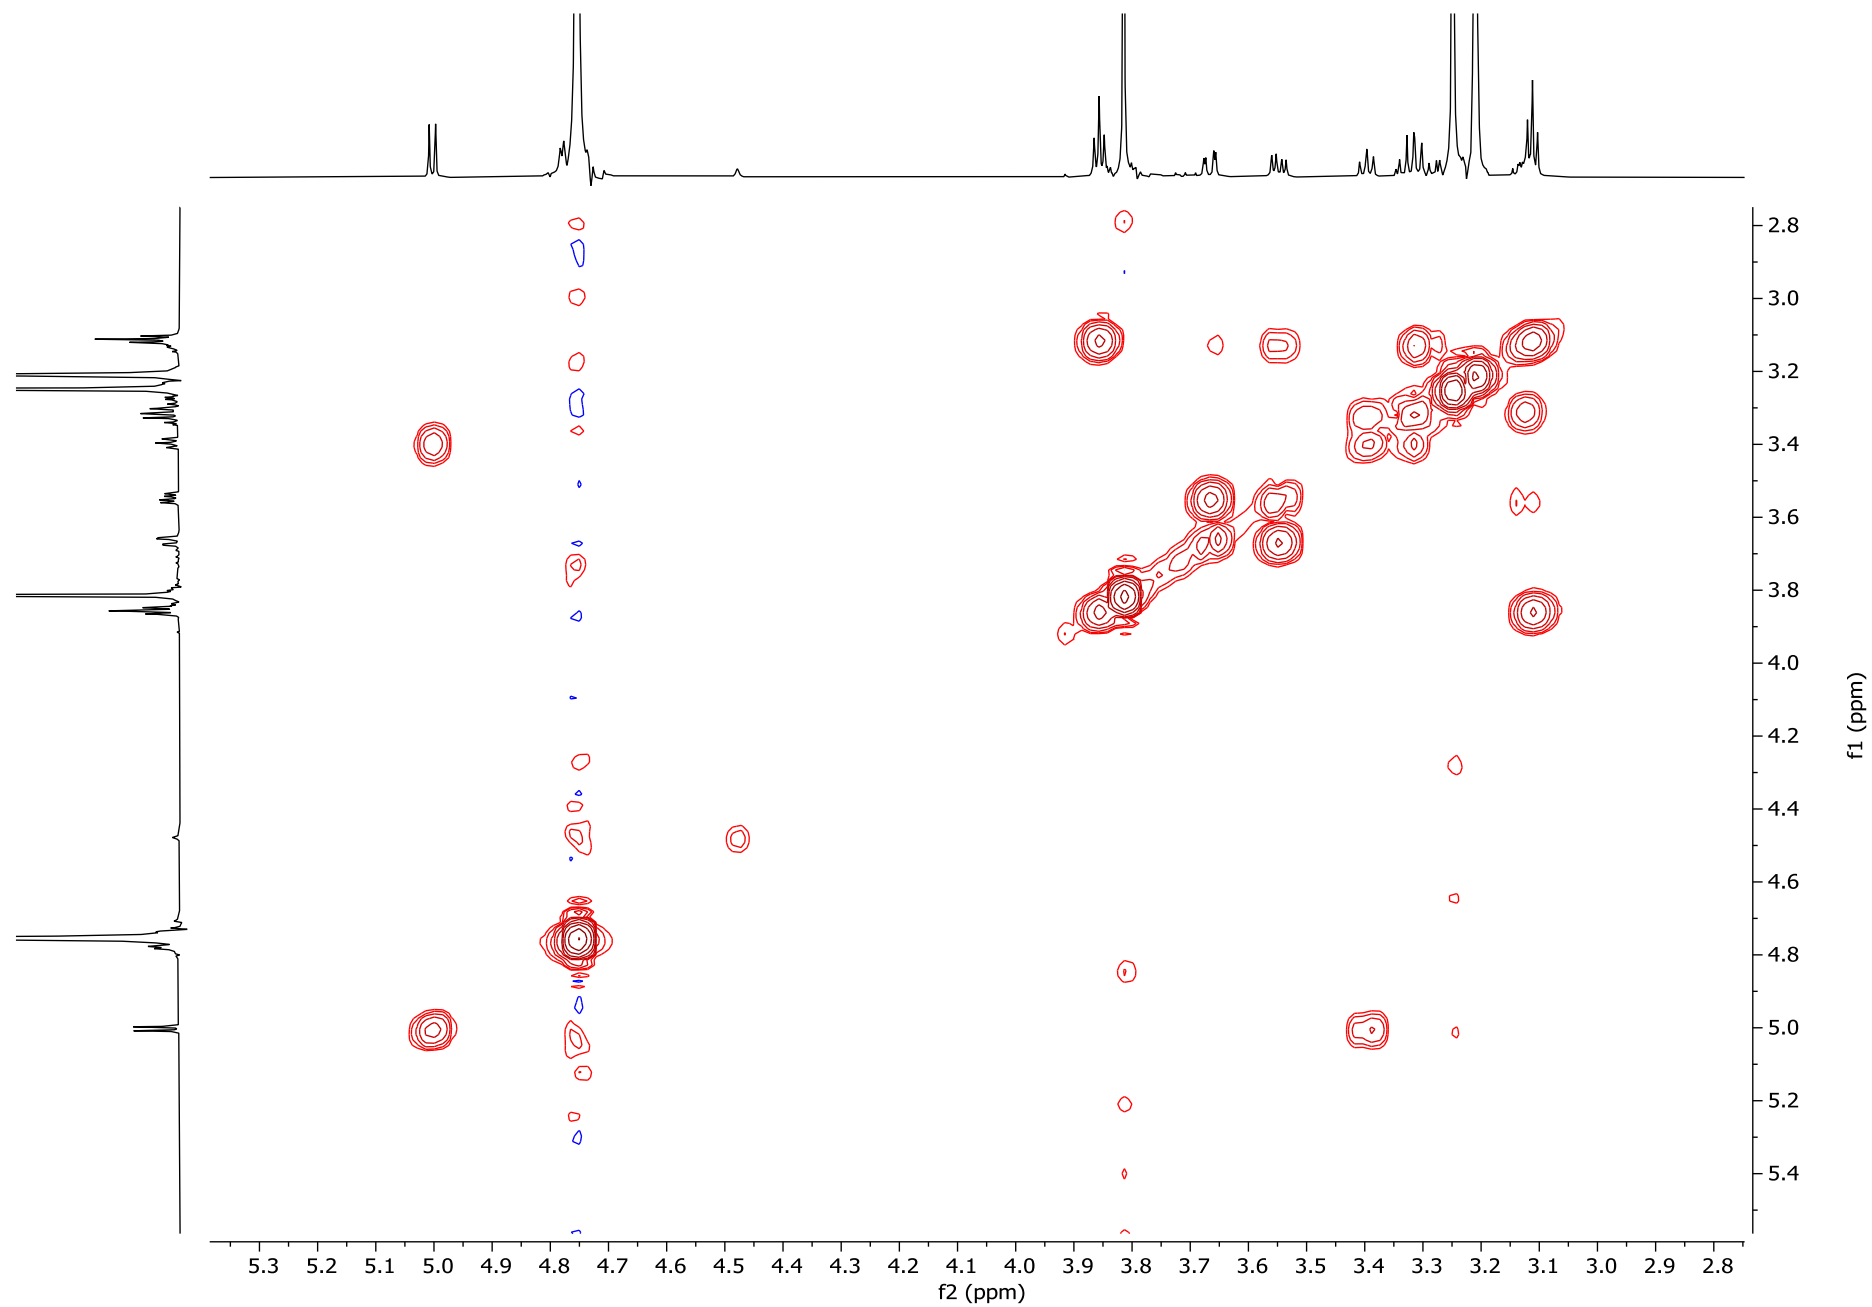

**Figure S20.** HSQC spectrum of **11** in methanol-*d*<sub>4</sub>

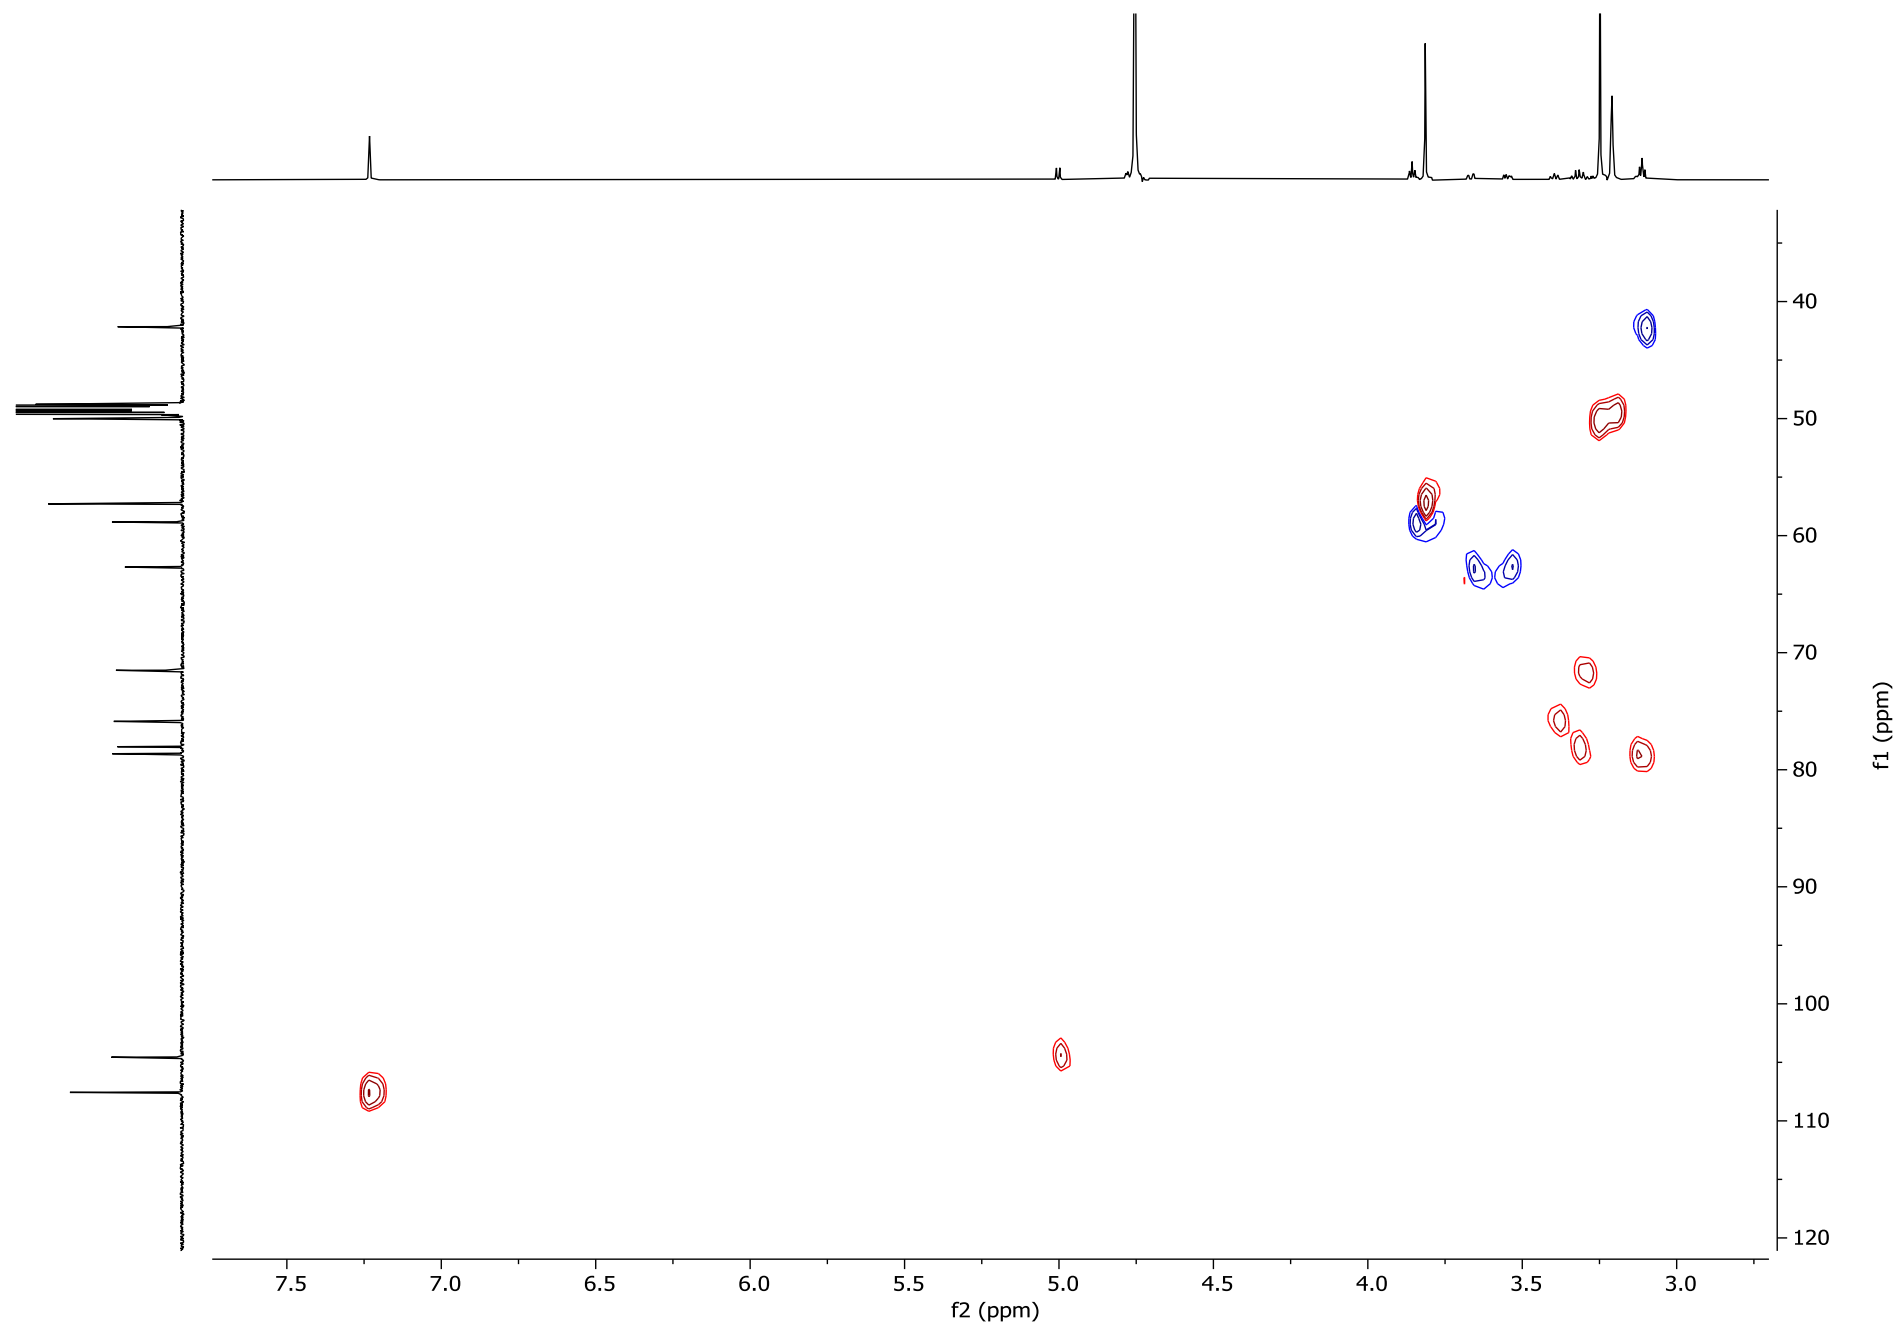

**Figure S21.** HMBC spectrum of **11** in methanol- $d_4$

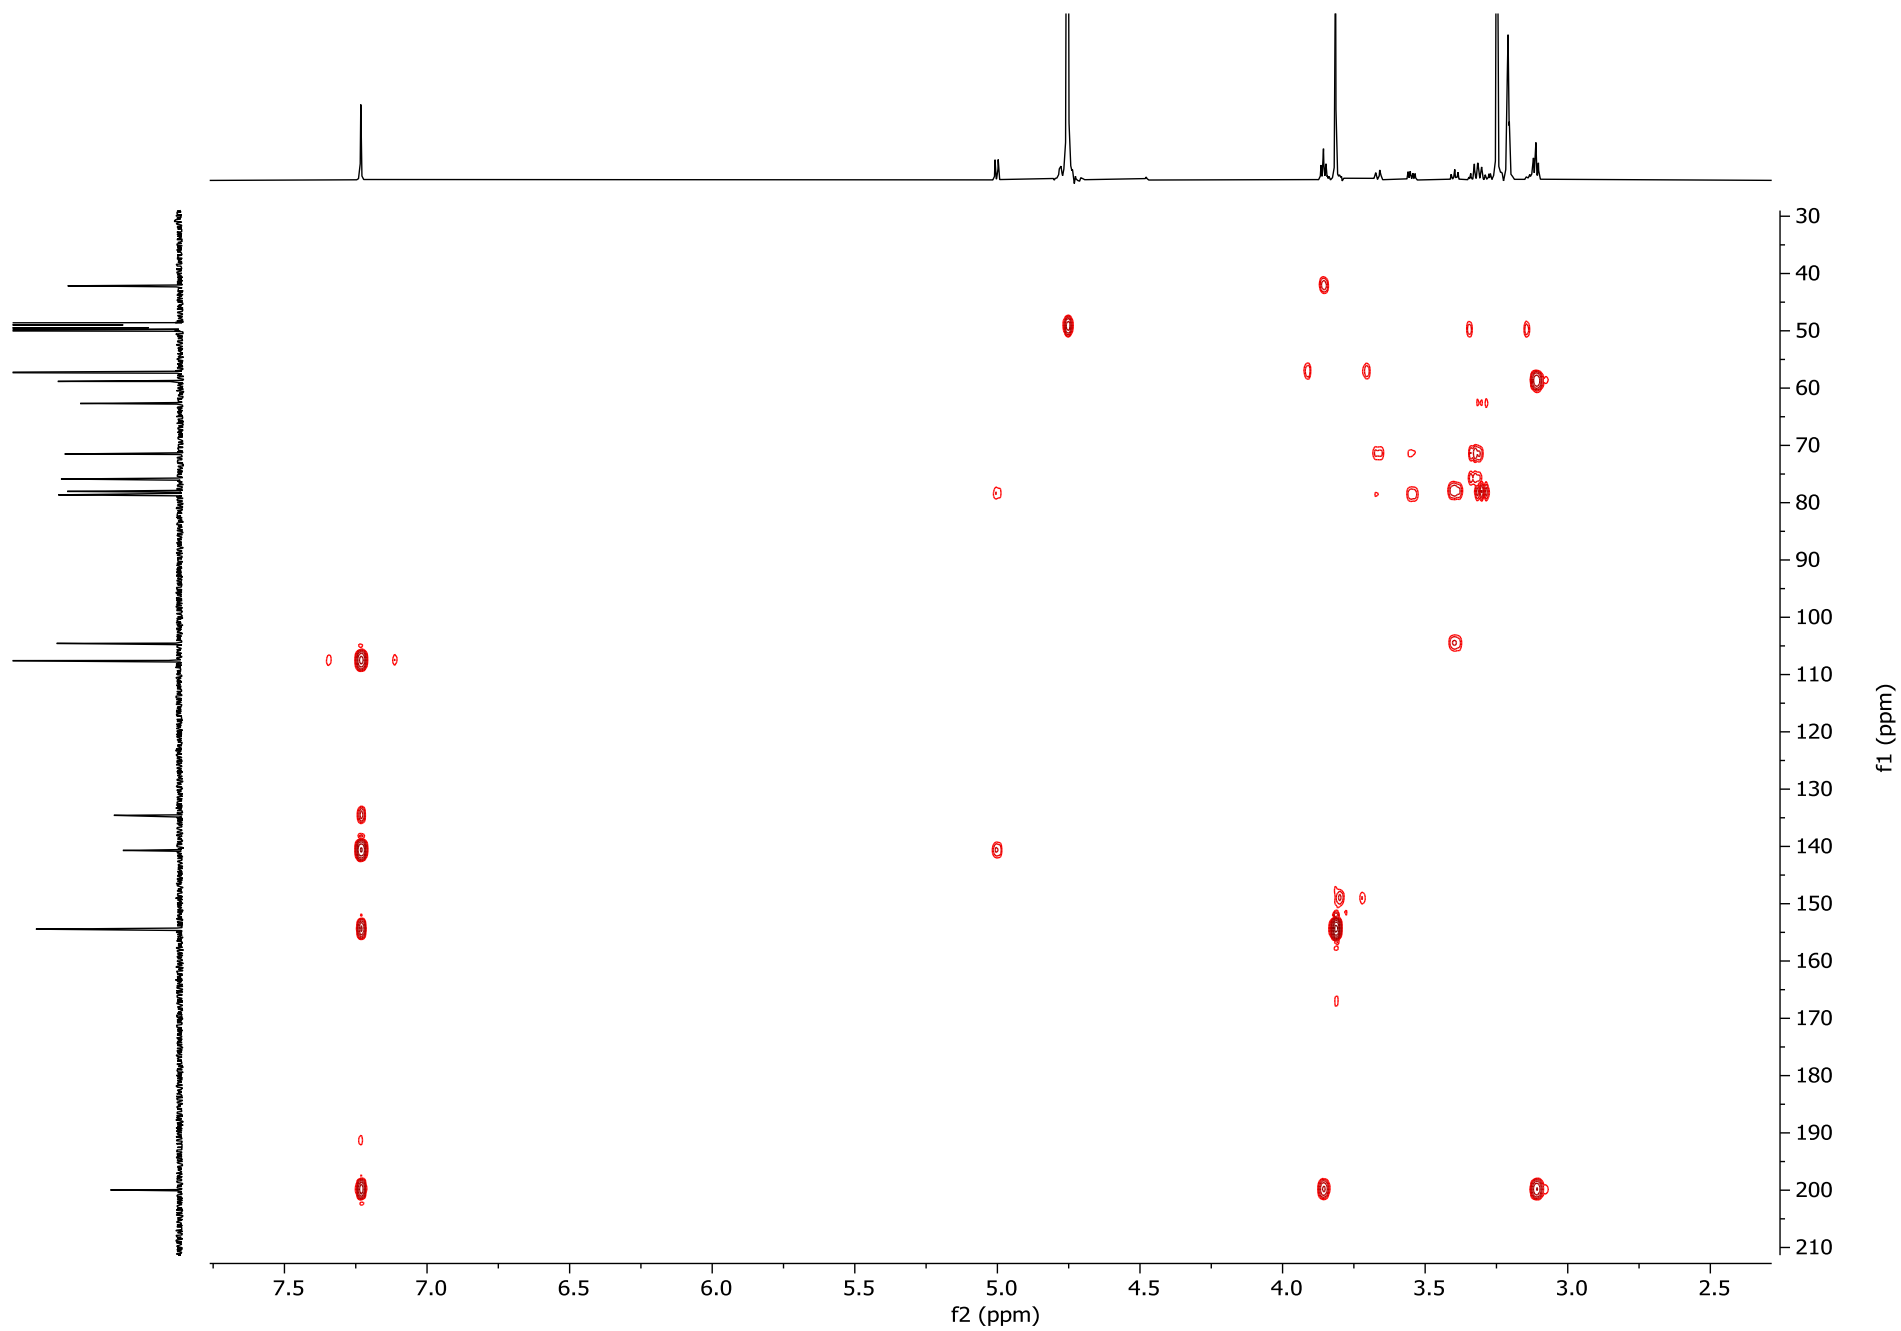

**Figure S22.** Extracted ion chromatograms (EICs,  $m/z$  447.1260) of chiral derivatized D- and L-glucopyranose purchased or obtained by hydrolysis of **11**.

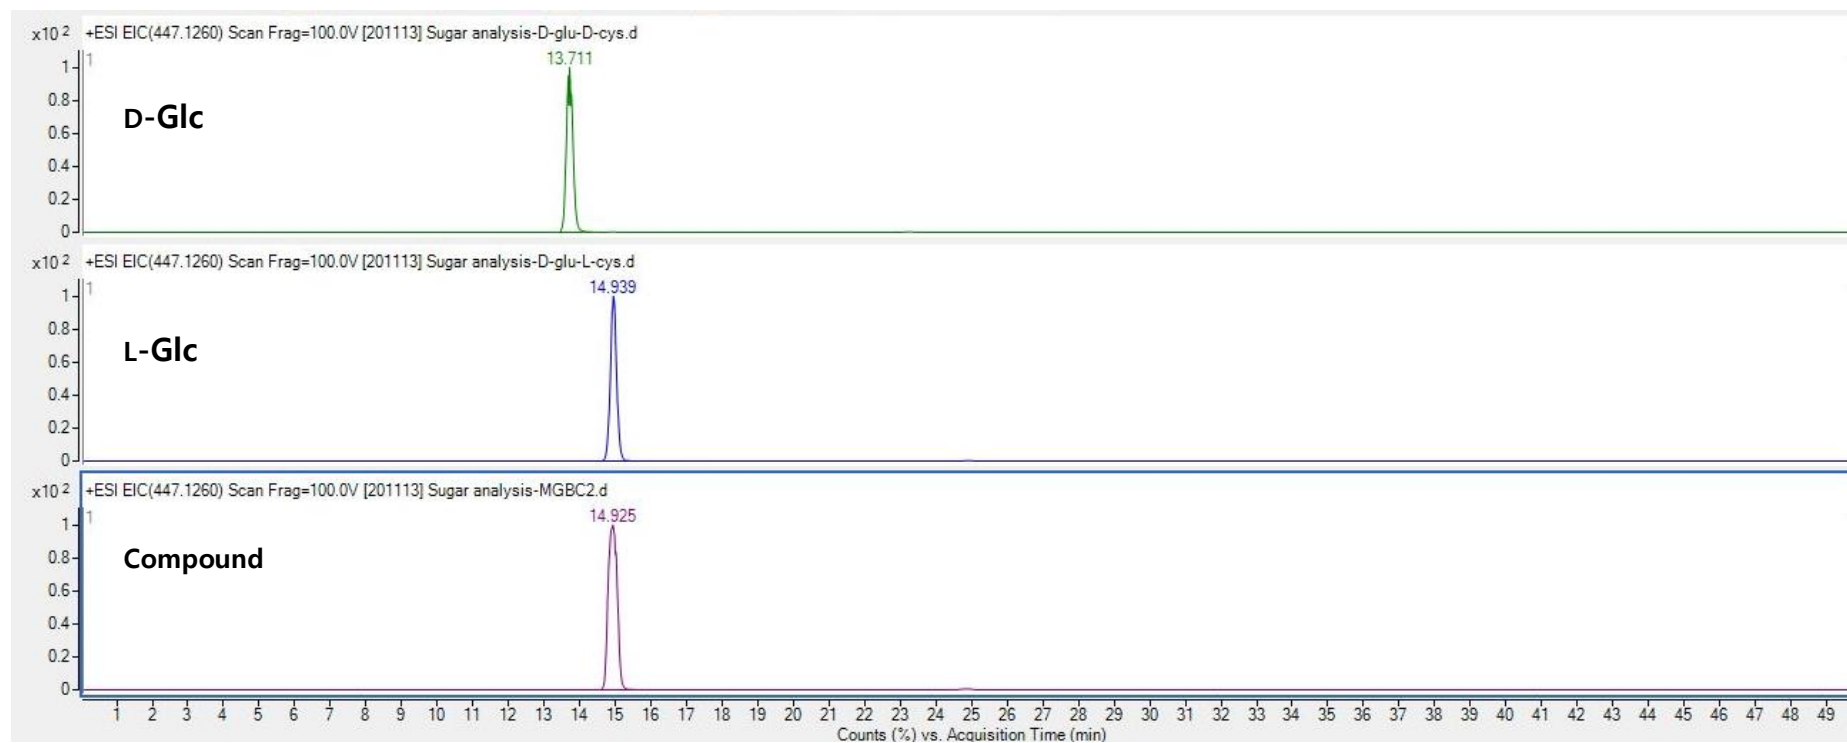

**Figure S23.**  $^1\text{H}$  NMR spectrum of **2** in chloroform-*d* (700 MHz)

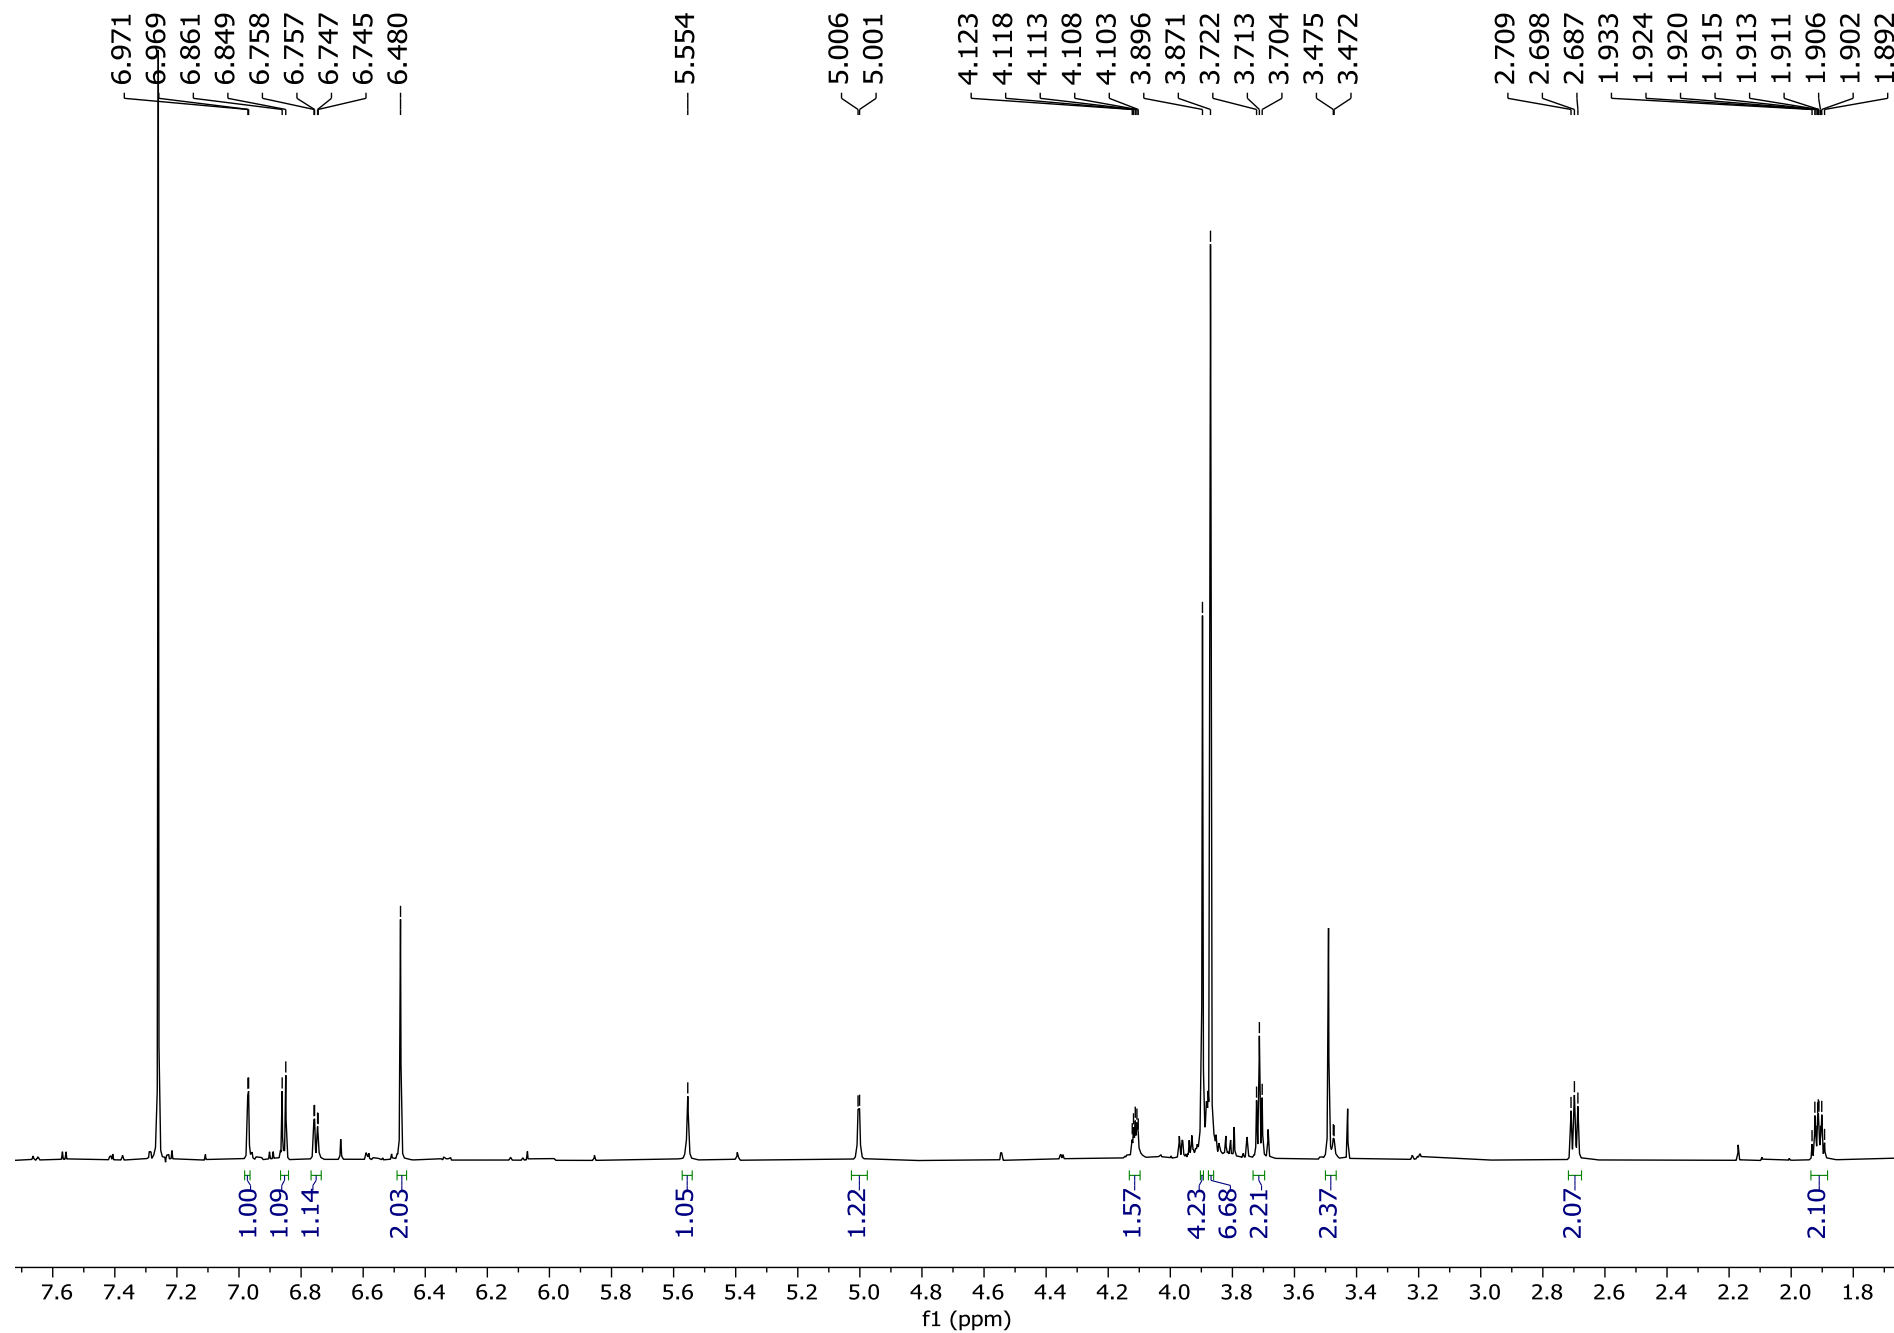

**Figure S24.**  $^{13}\text{C}$  NMR spectrum of **2** in chloroform-*d* (700 MHz)

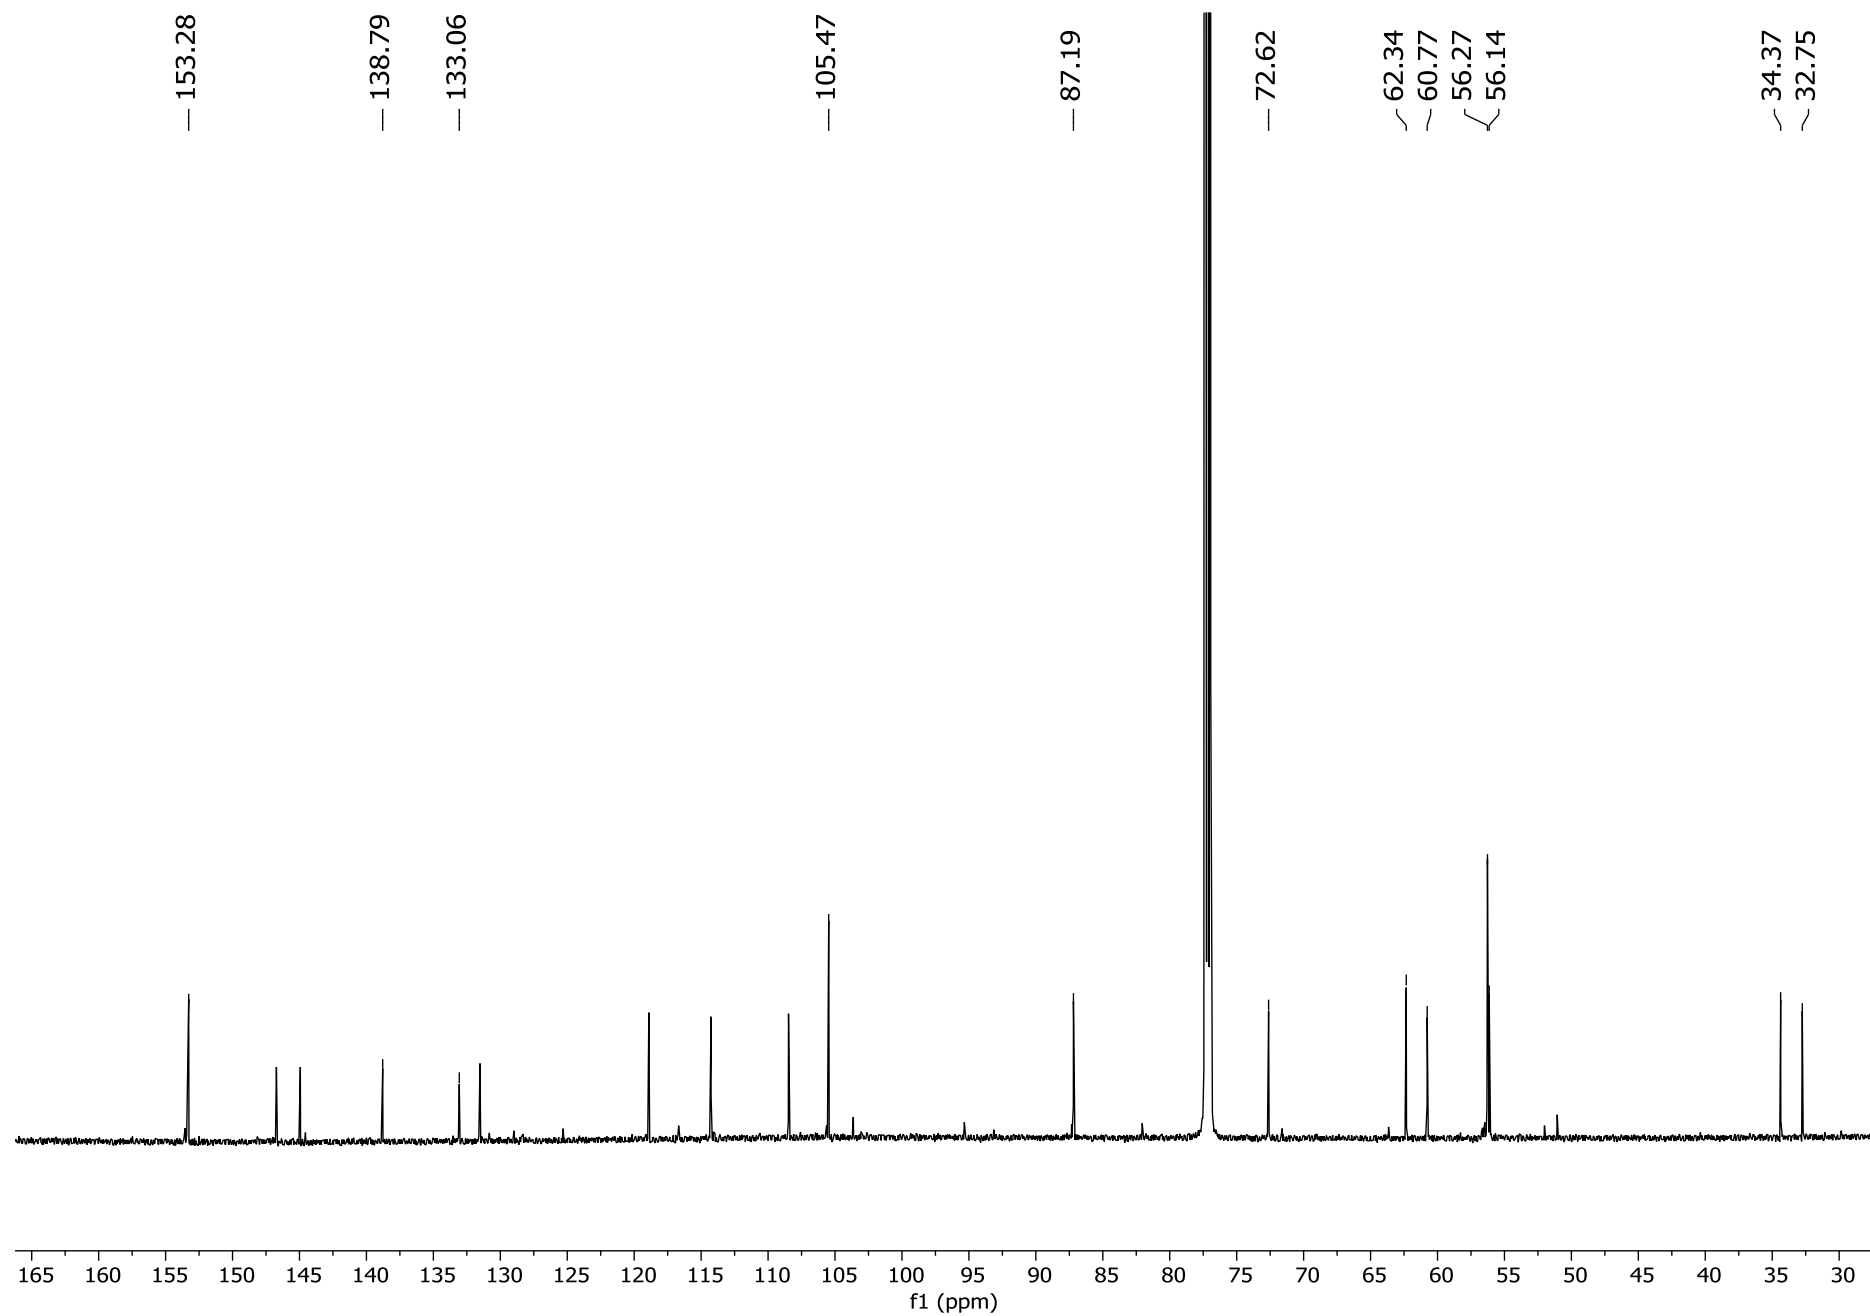

**Figure S25.**  $^1\text{H}$  NMR spectrum of **3** in chloroform-*d* (700 MHz)

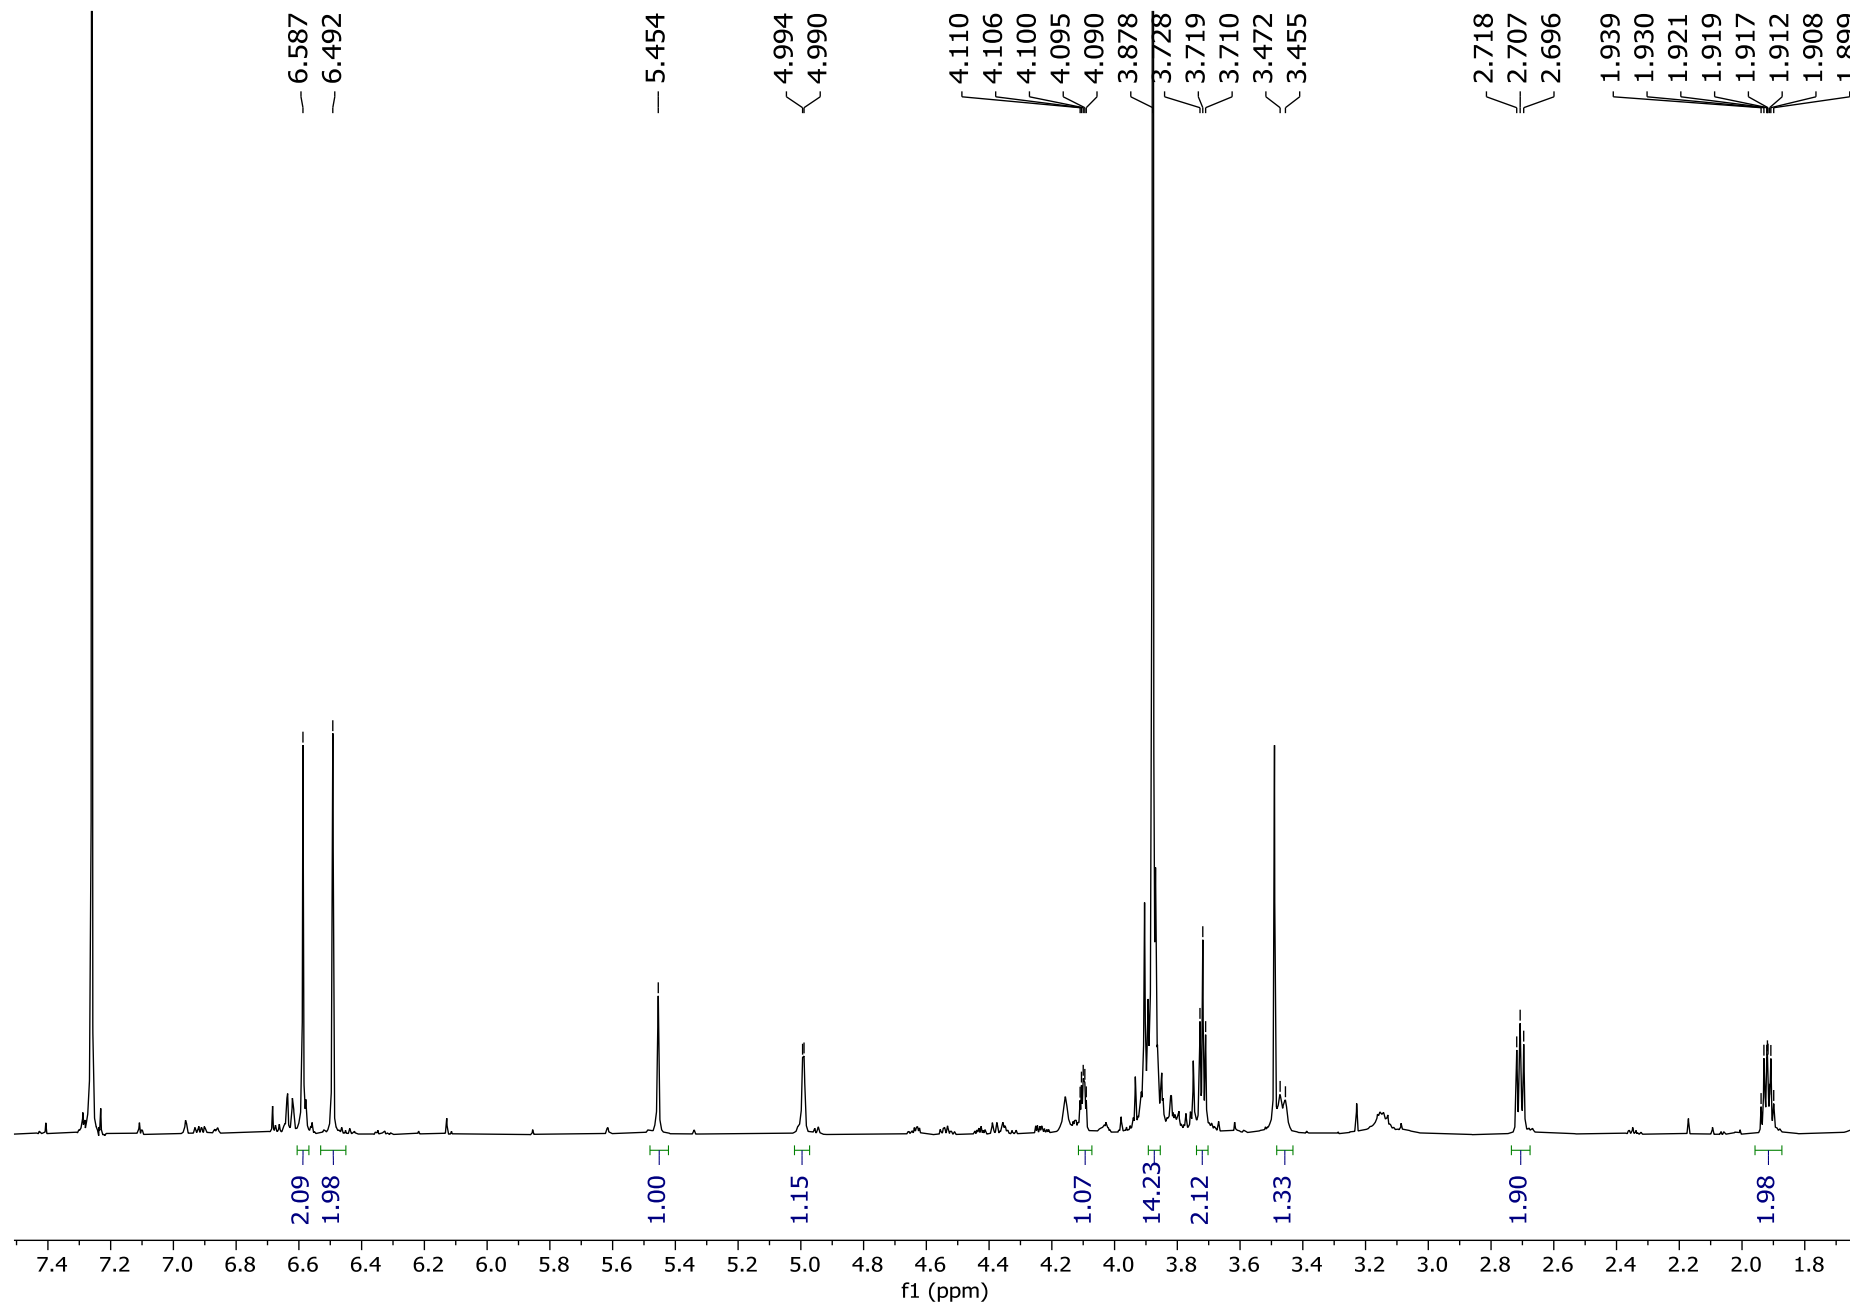

**Figure S26.**  $^{13}\text{C}$  NMR spectrum of **3** in chloroform-*d* (700 MHz)

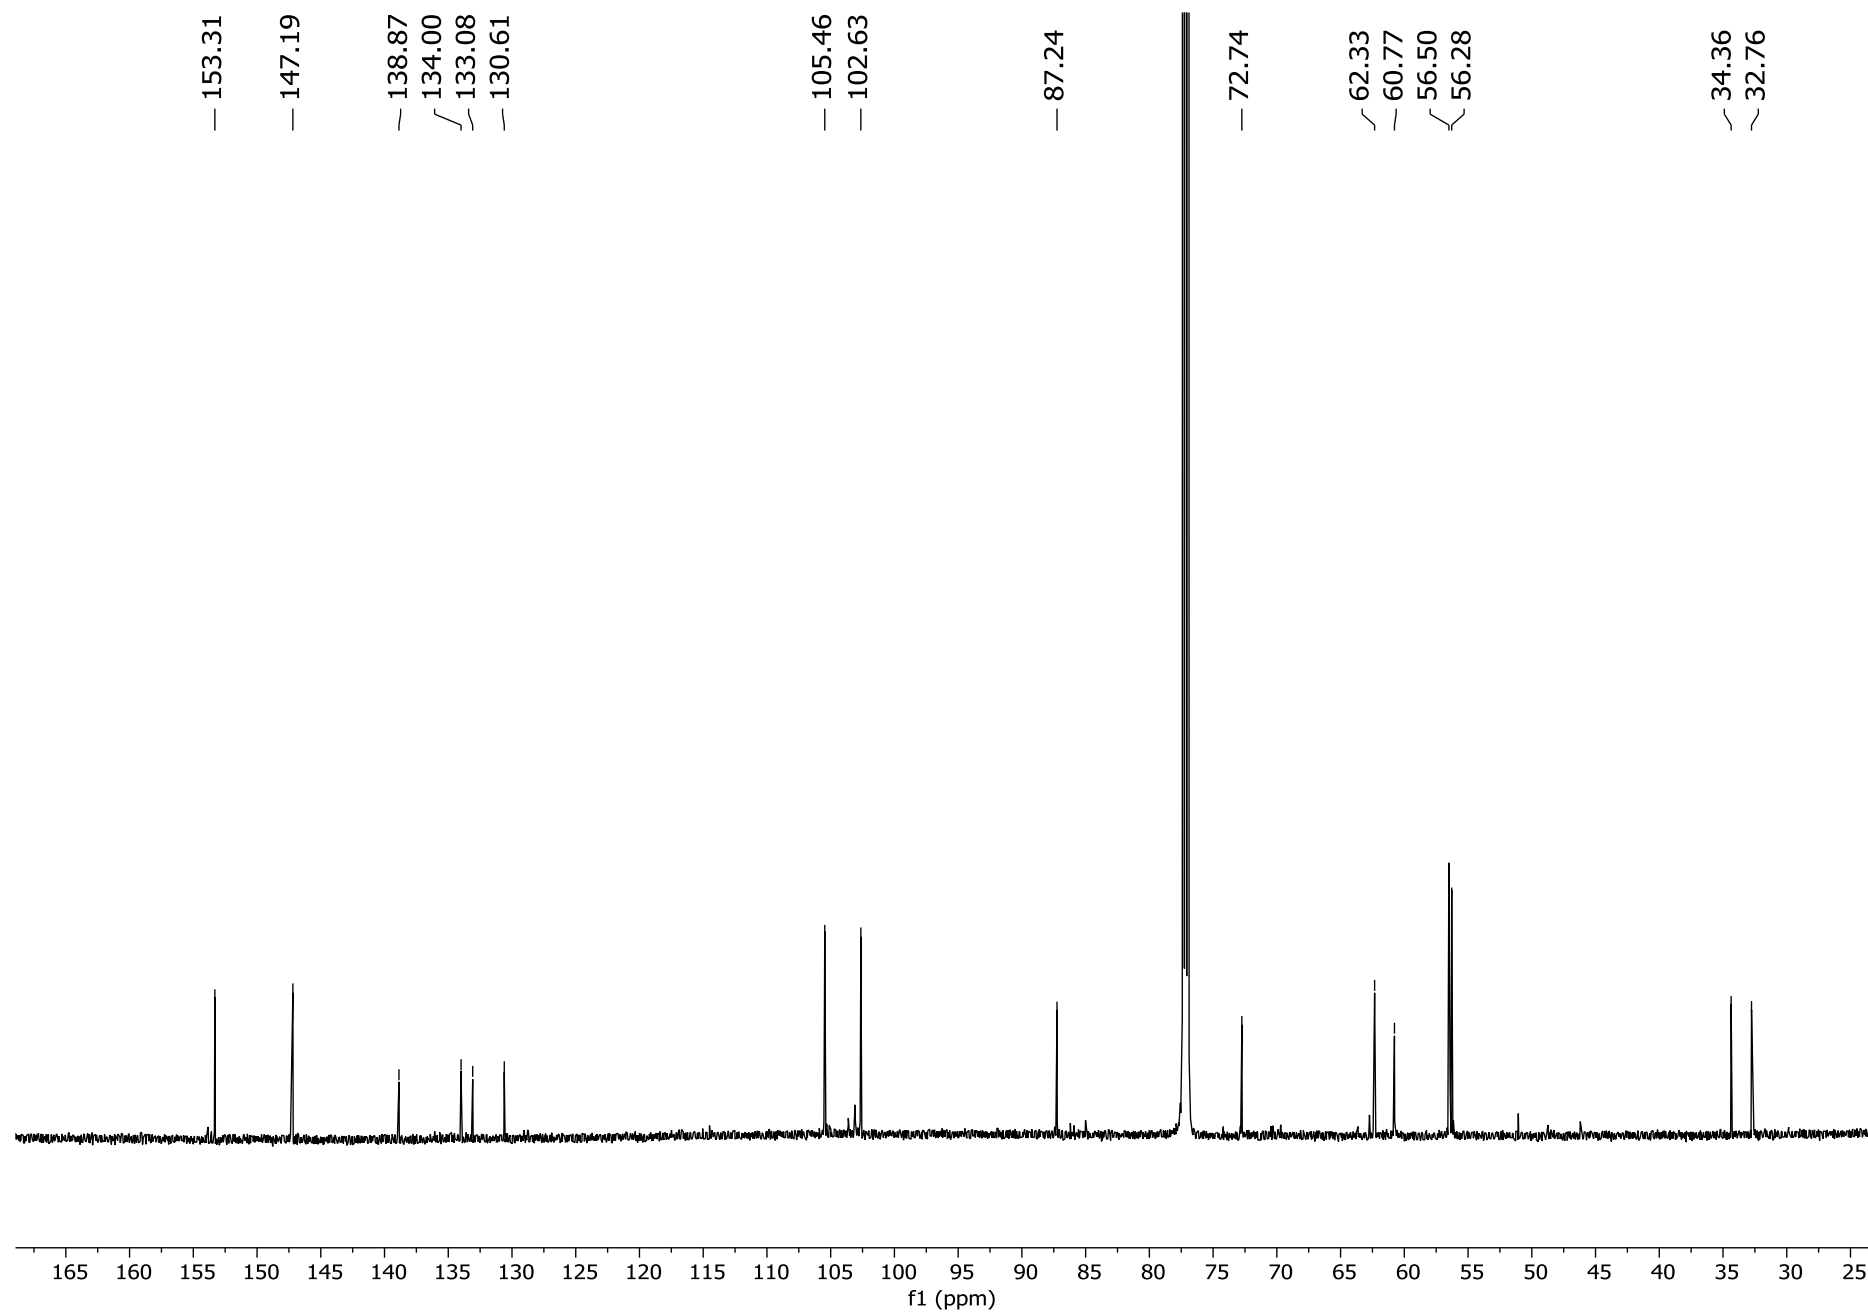

Supplement: Supplementary file 1 [file antioxidants-10-00551-s001.pdf]
